# Supplementary material for: LRR1 involved in the abscisic acid signaling pathway to regulate the early growth and development of Arabidopsis thaliana
Source: PeerJ. 2024 Nov 26;12:e18460. doi: 10.7717/peerj.18460 (PMC11606324; doi:10.7717/peerj.18460)
Supplement: Supplemental Information 1 [file peerj-12-18460-s001.xlsx]

## Sheet: Sheet1
					control 0 μM ABA																		30 μM ABA
																			day	WT	lrr1-1	lrr1-2	LRR1ox2	LRR1ox10	lrr1kin7	kin7
		day	WT	lrr1-1	lrr1-2	LRR1ox2	LRR1ox10	lrr1kin7	kin7										0	0	0	0	0	0	0	0
		0	0	0	0	0	0	0	0										1	1	3	2	0	0	6	4
		1	29	31	29	27	26	30	31										2（8:00）	1.5	5	4	0	0	16	4
		2（8:00）	30	33	31	29	28	33	34										2（20:00）	2	8	7	0	0	25	7
		2（20:00）	31	35	33	30	30	33	34										3	6	21	18	1	1	30	16
		3	31	35	34	31	32	33	34										4	8.5	28	23	1	2	31	21
		4	32	35	35	31	32	34	34										5	12	30	25	1	2	33	24
		5	35	35	35	31	32	35	34										6	13	32	27	1	2	35	26
		6	35	35	35	32	33	35	35
																								Percentile									Percentile
					percentile							percentile
																					day	WT	lrr1-1	lrr1-2	LRR1ox2	LRR1ox10					day	WT	lrr1-1	kin7	lrr1kin7
		day	WT	lrr1-1	lrr1-2	LRR1ox2	LRR1ox10			day	WT	lrr1-1	lrr1kin7	kin7							0	0	0	0	0	0					0	0	0	0	0
		0	0	0	0	0	0			0	0	0	0	0							1	3	7	6	0	0					1	3	7	11	17
		1	83	88	83	77	74			1	83	86	86	88							2（8:00）	4	14	10	0	0					2（8:00）	4	14	11	46
		2（8:00）	86	94	88	83	80			2（8:00）	86	92	95	93							2（20:00）	6	23	20	0	0					2（20:00）	6	23	20	71
		2（20:00）	88	100	94	86	86			2（20:00）	90	100	100	97							3	17	60	50	2	2					3	17	60	46	86
		3	93.5	100	97	88	91			3	94	100	100	97							4	24	80	66	3	6					4	24	80	60	90
		4	97	100	100	97	97			4	95	100	100	97							5	34	89	71	3	6					5	34	89	70	96
		5	100	100	100	99	98			5	100	100	100	100							6	37	93	79	3	6					6	37	93	73	100
		6	100	100	100	100	100			6	100	100	100	100
																									STDEV
						STDEV
																					day	WT	lrr1-1	lrr1-2	OE-lrr1-7	OE-lrr1-10	lrr1kin7	kin7
		day	WT	lrr1-1	lrr1-2	OE-lrr1-7	OE-lrr1-10	lrr1kin7	kin7												0	0	0	0	0	0	0	0
		0	0	0	0	0	0	0	0												1	1	0.5	1	0	0	1	0.5
		1	1	0.5	1	0	1	1	0.5												2（8:00）	1.5	1	0.5	0	0	3	2
		2（8:00）	1.5	1	0.5	1	0	3	2												2（20:00）	1	3	1.5	0	0	3	0.5
		2（20:00）	1	1	1.5	2	2	2	0.5												3	2	4	0	0	0	2	3.5
		3	2	2	0	0	0	2	2												4	2.5	4.5	3	0	0	5	1.5
		4	2.5	1	3	1	2	3	1.5												5	2	2	2.5	0	0	4	1.5
		5	2	2	1	1	1	2	1.5												6	1	2	2	0	0	2	2
		6	2	1	1	0	0	2	1

## Sheet: Sheet2
								seed germination on sixth day
					WT	lrr1-1	lrr1-2	kin7	lrr1kin7	LRR1ox2	LRR1ox10
				control	100	100	100	100	100	100	100
				30 μM ABA	36	93	79	73	100	3	6
								STDEV
					1	1	1	1	2	0	0
					1	2	2.3	2.4	2	1	1

## Sheet: Sheet3
						WT	lrr1-1	lrr1-2	kin7	lrr1kin7	LRR1ox2	LRR1ox10
						40	92	80	80	100	4	5
						38	90	78	78	99	2	3
						36	93	79	73	100	3	6
					WT	lrr1kin7			WT	LRR1ox2	LRR1ox10
					40	100			40	4	5
					38	99			38	2	3
					36	100			36	3	6

## Sheet: Sheet4
analysis of variance:No duplicate two-factor analysis
SUMMARY	Number of Observations	Sum	Average	Variance
line 1	7	401	57.2857	1655.57
line 2	7	388	55.4286	1669.95
line 3	7	390	55.7143	1638.57
column 1	3	114	38	4
column 2	3	275	91.6667	2.33333
column 3	3	237	79	1
column 4	3	231	77	13
column 5	3	299	99.6667	0.333333
column 6	3	9	3	1
column 7	3	14	4.66667	2.33333
ANOVA
SD	SS	df	MS	F	P-value	F crit
column	14	2	7	2.47059	0.126307	3.88529
line	29750.6	6	4958.43	1750.03	6.18348e-17	2.99612
error value	34	12	2.83333
Total	29798.6	20

## Sheet: WT-lrr1kin7
Factorial Analysis: One-Factor ANOVA
SUMMARY
Group	Number of Observations	Sum	Average	Variance
column 1	3	114	38	4
column 2	3	231	77	13
ANOVA
SD	SS	df	MS	F	P-value	F crit
Between groups	2281.5	1	2281.5	268.412	8.12527e-05	7.70865
Within groups	34	4	8.5
Total	2315.5	5

## Sheet: WT-OE
Factorial Analysis: One-Factor ANOVA
SUMMARY
Group	Number of Observations	Sum	Average	Variance
column 1	3	114	38	4
column 2	3	9	3	1
column 3	3	14	4.66667	2.33333
ANOVA
SD	SS	df	MS	F	P-value	F crit
Between groups	2338.89	2	1169.44	478.409	2.42003e-07	5.14325
Within groups	14.6667	6	2.44444
Total	2353.56	8
