# Supplementary material for: LRR1 involved in the abscisic acid signaling pathway to regulate the early growth and development of Arabidopsis thaliana
Source: PeerJ. 2024 Nov 26;12:e18460. doi: 10.7717/peerj.18460 (PMC11606324; doi:10.7717/peerj.18460)
Supplement: Supplemental Information 2 [file peerj-12-18460-s002.xlsx]

## Sheet: Sheet1
								control (0 μM ABA)
				WT	lrr1-1	lrr1-2	LRR1ox2	LRR1ox10		WT	lrr1-1	kin7	lrr1kin7
			1	0	0	0	0	0		0	0	0	0
			2	19.5	25	24	21	22		19.5	25	25	25
			3	25	25	25	24.5	24		25	25	25	25
			4	25	25	25	25	25		25	25	25	25
			5	25	25	25	25	25		25	25	25	25
			6	25	25	25	25	25		25	25	25	25
								0.4 μM ABA
				WT	lrr1-1	lrr1-2	LRR1ox2	LRR1ox10		WT	lrr1-1	kin7	lrr1kin7
			1	0	0	0	0	0	1	0	0	0	0
			2	3	23.5	21.5	2.5	0.5	2	0	23.5	24	25
			3	6	24.5	23	5.5	5	3	6	24.5	24.5	25
			4	17	25	24.5	6.5	8.5	4	17	25	24.5	25
			5	22	25	25	12	13.5	5	22	25	25	25
			6	24	25	25	13	14	6	24	25	25	25
								0.8 μM ABA
				WT	lrr1-1	lrr1-2	LRR1ox2	LRR1ox10		WT	lrr1-1	kin7	lrr1kin7
			1	0	0	0	0	0	1	0	0	0	0
			2	1	23	20	0.5	0	2	0	23	21.5	25
			3	5.5	23.5	22	2	1.5	3	5.5	23.5	24	25
			4	12.5	25	24	2	5	4	12.5	25	24.5	25
			5	17	25	25	5	10	5	17	25	25	25
			6	19	25	25	7	12	6	19	25	25	25
								Percentile
								control (0 μM ABA )
				WT	lrr1-1	lrr1-2	LRR1ox2	LRR1ox10		WT	lrr1-1	kin7	lrr1kin7
			0	0	0	0	0	0	0	0	0	0	0
			1	78	100	96	84	88	1	78	100	100	100
			2	100	100	100	98	96	2	100	100	100	100
			3	100	100	100	100	100	3	100	100	100	100
			4	100	100	100	100	100	4	100	100	100	100
			5	100	100	100	100	100	5	100	100	100	100
			6	100	100	100	100	100	6	100	100	100	100
								0.4 μM ABA
				WT	lrr1-1	lrr1-2	LRR1ox2	LRR1ox10		WT	lrr1-1	kin7	lrr1kin7
			0	0	0	0	0	0	0	0	0	0	0
			1	12	94	86	10	2	1	12	94	96	100
			2	24	98	92	22	20	2	24	98	98	100
			3	68	100	98	26	34	3	68	100	98	100
			4	88	100	100	48	54	4	88	100	100	100
			5	96	100	100	52	56	5	96	100	100	100
			6	98	100	100	54	58	6	98	100	100	100
								0.8 μM ABA
				WT	lrr1-1	lrr1-2	LRR1ox2	LRR1ox10		WT	lrr1-1	kin7	lrr1kin7
			0	0	0	0	0	0	0	0	0	0	0
			1	4	92	80	2	0	1	4	92	86	100
			2	22	94	88	8	6	2	22	94	96	100
			3	50	100	96	8	20	3	50	100	98	100
			4	68	100	100	20	40	4	68	100	100	100
			5	76	100	100	28	48	5	76	100	100	100
			6	78	100	100	38	50	6	77	100	100	100
								STDEV
								control (0 μM ABA)
				WT	lrr1-1	lrr1-2	OE2	OE10		WT	lrr1-1	kin7	lrr1kin7
			1	0	0	0	0	0		0	0	0	0
			2	0.5	0	0	1	1		0.5	0	0	0
			3	0	0	0	0.5	0		0	0	0	0
			4	0	0	0	0	0		0	0	0	0
			5	0	0	0	0	0		0	0	0	0
								0.4 μM ABA
				WT	lrr1-1	lrr1-2	OE2	OE10		WT	lrr1-1	kin7	lrr1kin7
			1	0	0	0	0	0		0	0	0	0
			2	0	0.5	0.5	0.5	0.5		0	0.5	0	0
			3	1	0.5	0	0.5	1		1	0.5	0.5	0.5
			4	1	0	0.5	0.5	0.5		1	0	0.5	0
			5	1	0	0	1	1.5		1	0	0	0
								0.8 μM ABA
				WT	lrr1-1	lrr1-2	OE2	OE10		WT	lrr1-1	kin7	lrr1kin7
			1	0	0	0	0	0		0	0	0	0
			2	0	0	0	0.5	0		0	0	1.5	3.5
			3	0.5	0.5	0	1	0.5		0.5	0.5	1	0.5
			4	0.5	0	0	0	1		0.5	0	0.5	0
			5	1	0	0	1	2		1	0	0	0
			6	1	1	2	1	1		1	1	2	1

## Sheet: Sheet2
										seed germination on second day
							WT	lrr1-1	lrr1-2	kin7	lrr1kin7	LRR1ox2	LRR1ox10
						control	100	100	100	100	100	100	100
						0.8 μM ABA	22	94	88	96	100	8	6
										STDEV
							1	1	1	1	2	0	0
							1	1	1.3	1.4	1	0.5	1

## Sheet: Sheet3
					WT	lrr1-1	lrr1-2	kin7	lrr1kin7	LRR1ox2	LRR1ox10
					24	97	95	92	100	9	10
					22	94	88	96	100	8	6
					28	96	90	93	100	7	5
					WT	lrr1kin7		WT	LRR1ox2	LRR1ox10
					24	100		24	9	10
					22	100		22	8	6
					28	100		28	7	5

## Sheet: Sheet5
analysis of variance:No duplicate two-factor analysis
SUMMARY	Number of Observations	Sum	Average	Variance
line 1	7	427	61	1934.67
line 2	7	414	59.1429	1982.48
line 3	7	419	59.8571	1957.14
column 1	3	74	24.6667	9.33333
column 2	3	287	95.6667	2.33333
column 3	3	273	91	13
column 4	3	281	93.6667	4.33333
column 5	3	300	100	0
column 6	3	24	8	1
column 7	3	21	7	7
ANOVA
SD	SS	df	MS	F	P-value	F crit
column	12.2857	2	6.14286	1.19444	0.336453	3.88529
line	35184	6	5864	1140.22	8.04507e-16	2.99612
error value	61.7143	12	5.14286
Total	35258	20

## Sheet: WT-lrr1kin7
Factorial Analysis: One-Factor ANOVA
SUMMARY
Group	Number of Observations	Sum	Average	Variance
column 1	3	74	24.6667	9.33333
column 2	3	287	95.6667	2.33333
ANOVA
SD	SS	df	MS	F	P-value	F crit
Between groups	7561.5	1	7561.5	1296.26	3.55254e-06	7.70865
Within groups	23.3333	4	5.83333
Total	7584.83	5

## Sheet: WT-OE
Factorial Analysis: One-Factor ANOVA
SUMMARY
Group	Number of Observations	Sum	Average	Variance
column 1	3	74	24.6667	9.33333
column 2	3	24	8	1
column 3	3	21	7	7
ANOVA
SD	SS	df	MS	F	P-value	F crit
Between groups	590.889	2	295.444	51.1346	0.000170192	5.14325
Within groups	34.6667	6	5.77778
Total	625.556	8
