# Supplementary material for: LRR1 involved in the abscisic acid signaling pathway to regulate the early growth and development of Arabidopsis thaliana
Source: PeerJ. 2024 Nov 26;12:e18460. doi: 10.7717/peerj.18460 (PMC11606324; doi:10.7717/peerj.18460)
Supplement: Supplemental Information 3 [file peerj-12-18460-s003.xlsx]

## Sheet: DATA1
																		9 day
						greening of cotyledons
							0.4 μM ABA								WT	lrr1kin7	lrr1-1	lrr1-2	kin7	LRR1ox2	LRR1ox10
														control	100	100	100	100	100	100	100
														0.4 μM ABA	23.6	87.5	69.4	63.8	66.7	15.3	19.4
			7d		WT	lrr1kin7	lrr1-1	lrr1-2	kin7	LRR1ox2	LRR1ox10
				control	36	36	36	36	36	36	36			STDEV	0	0	0	0	0	0	0
															0.707107	0.707107	1.41421	1.41421	1.41421	0.707107	0
				ABA	4	7	6	5	7	3	2
					4	8	6	6	7	2	1
			8d		WT	lrr1kin7	lrr1-1	lrr1-2	kin7	LRR1ox2	LRR1ox10
				control	36	36	36	36	36	36	36
				ABA	6	24	20	16	18	6	4
					5	22	18	15	17	3	2
			9d		WT	lrr1kin7	lrr1-1	lrr1-2	kin7	LRR1ox2	LRR1ox10
				control	36	36	36	36	36	36	36
				ABA	8	32	26	22	23	6	7
					9	31	24	24	25	5	7
				AV	8.5	31.5	25	23	24	5.5	7
				STDEV	0.707107	0.707107	1.41421	1.41421	1.41421	0.707107	0
			10d		WT	lrr1kin7	lrr1-1	lrr1-2	kin7	LRR1ox2	LRR1ox10
				control	36	36	36	36	36	36	36
				ABA	9	33	26	23	24	7	8
					10	32	24	26	25	6	7
				STDEV	0.707107	0.707107	1.41421	2.12132	0.707107	0.707107	0.707107
			11d		WT	lrr1kin7	lrr1-1	lrr1-2	kin7	LRR1ox2	LRR1ox10
				control	36	36	36	36	36	36	36
				ABA	12	34	27	23	24	8	9
					10	33	25	26	26	6	7

## Sheet: DATA
				WT	lrr1kin7	lrr1-1	lrr1-2	kin7	LRR1ox2	LRR1ox10
				22	89	72	61	68	13	15
				23.6	87.5	69.4	63.8	66.7	15.3	19.4
				25	90	70	62	65	14	17
				WT	lrr1kin7		WT	LRR1ox2	LRR1ox10
				22	89		22	13	15
				23.6	87.5		23.6	15.3	19.4
				25	90		25	14	17

## Sheet: Sheet3
analysis of variance:No duplicate two-factor analysis
SUMMARY	Number of Observations	Sum	Average	Variance
line 1	7	340	48.5714	968.952
line 2	7	345.7	49.3857	847.785
line 3	7	343	49	895.333
column 1	3	70.6	23.5333	2.25333
column 2	3	266.5	88.8333	1.58333
column 3	3	211.4	70.4667	1.85333
column 4	3	186.8	62.2667	2.01333
column 5	3	199.7	66.5667	2.26333
column 6	3	42.3	14.1	1.33
column 7	3	51.4	17.1333	4.85333
ANOVA
SD	SS	df	MS	F	P-value	F crit
column	2.32286	2	1.16143	0.464926	0.639037	3.88529
line	16242.4	6	2707.07	1083.66	1.09097e-15	2.99612
error value	29.9771	12	2.4981
Total	16274.7	20

## Sheet: WT-lrr1kin7
Factorial Analysis: One-Factor ANOVA
SUMMARY
Group	Number of Observations	Sum	Average	Variance
1	3	168	56	1
2	3	300	100	0
ANOVA
SD	SS	df	MS	F	P-value	F crit
Between groups	2904	1	2904	5808	1.77664e-07	7.70865
Within groups	2	4	0.5
Total	2906	5

## Sheet: WT--OE
Factorial Analysis: One-Factor ANOVA
SUMMARY
Group	Number of Observations	Sum	Average	Variance
column 1	3	70.6	23.5333	2.25333
column 2	3	42.3	14.1	1.33
column 3	3	51.4	17.1333	4.85333
ANOVA
SD	SS	df	MS	F	P-value	F crit
Between groups	139.149	2	69.5744	24.74	0.00126486	5.14325
Within groups	16.8733	6	2.81222
Total	156.022	8

## Sheet: WT-OE
方差分析：单因素方差分析
SUMMARY
组	观测数	求和	平均	方差
列 1	3	70.6	23.5333	2.25333
列 2	3	42.3	14.1	1.33
列 3	3	51.4	17.1333	4.85333
方差分析
差异源	SS	df	MS	F	P-value	F crit
组间	139.149	2	69.5744	24.74	0.00126486	5.14325
组内	16.8733	6	2.81222
总计	156.022	8
