# Supplementary material for: LRR1 involved in the abscisic acid signaling pathway to regulate the early growth and development of Arabidopsis thaliana
Source: PeerJ. 2024 Nov 26;12:e18460. doi: 10.7717/peerj.18460 (PMC11606324; doi:10.7717/peerj.18460)
Supplement: Supplemental Information 4 [file peerj-12-18460-s004.xls]

## Sheet: Results
Block Type	96alum
Chemistry	SYBR_GREEN
Experiment File Name-----Data 4 LRB1 Regulates ABA-induced Gene Expression data, 0.8 μM (±) ABA treatmentABI3
Experiment Run End Time	2017-05-07 04:28:31
Instrument Type	sds7500
Passive Reference	ROX
Well	Sample Name	Target Name	Task	Reporter	Quencher	RQ	RQ Min	RQ Max	Cт	Cт Mean	Cт SD	ΔCт	ΔCт Mean	ΔCт SE	HK Control ΔCт Mean	HK Control ΔCт SE	ΔΔCт	Automatic Ct Threshold	Ct Threshold	Automatic Baseline	Baseline Start	Baseline End	Efficiency	Tm1	Tm2	Tm3	Comments	AMPNC	HIGHSD	NOAMP	EXPFAIL
A1	CK WT	ACT	UNKNOWN	SYBR	None				22.2704	22.1025	1.03463							TRUE	0.0672595	TRUE	3	20	1	79.6				N	Y	N	N
A2	CK lrb1	ACT	UNKNOWN	SYBR	None				22.2476	21.3997	0.550097							TRUE	0.0672595	TRUE	3	20	1	79.6				N	Y	N	N
A3	CK lrb2	ACT	UNKNOWN	SYBR	None				21.8877	20.9022	1.06195							TRUE	0.0672595	TRUE	3	20	1	79.6				N	Y	N	N
A4	CK lrb1lrb2	ACT	UNKNOWN	SYBR	None				22.512	22.4959	0.957477							TRUE	0.0672595	TRUE	3	20	1	79.8				N	Y	N	N
A5	ABA WT	ACT	UNKNOWN	SYBR	None				20.4358	19.7675	0.694744							TRUE	0.0672595	TRUE	3	18	1	79.8				N	Y	N	N
A6	ABA lrb1	ACT	UNKNOWN	SYBR	None				19.4697	19.2907	0.194492							TRUE	0.0672595	TRUE	3	17	1	79.8				N	N	N	N
A7	ABA lrb2	ACT	UNKNOWN	SYBR	None				20.943	20.2294	1.41057							TRUE	0.0672595	TRUE	3	19	1	79.8				N	Y	N	N
A8	ABA lrb1lrb2	ACT	UNKNOWN	SYBR	None				18.9614	20.5776	1.05896							TRUE	0.0672595	TRUE	3	16	1	80				N	Y	N	N
A9	ABA WT	ACT	UNKNOWN	SYBR	None				20.3712	19.7675	0.694744							TRUE	0.0672595	TRUE	3	18	1	79.8				N	Y	N	N
A10	ABA lrb1	ACT	UNKNOWN	SYBR	None				19.2405	19.2907	0.194492							TRUE	0.0672595	TRUE	3	17	1	79.4				N	N	N	N
A11	ABA lrb2	ACT	UNKNOWN	SYBR	None				21.6907	20.2294	1.41057							TRUE	0.0672595	TRUE	3	20	1	79.4				N	Y	N	N
A12	ABA lrb1lrb2	ACT	UNKNOWN	SYBR	None				21.7773	20.5776	1.05896							TRUE	0.0672595	TRUE	3	20	1	79				N	Y	N	N
B1	CK WT	ACT	UNKNOWN	SYBR	None				22.9556	22.1025	1.03463							TRUE	0.0672595	TRUE	3	21	1	79.8				N	Y	N	N
B2	CK lrb1	ACT	UNKNOWN	SYBR	None				20.8747	21.3997	0.550097							TRUE	0.0672595	TRUE	3	18	1	80				N	Y	N	N
B3	CK lrb2	ACT	UNKNOWN	SYBR	None				21.5525	20.9022	1.06195							TRUE	0.0672595	TRUE	3	19	1	80.2				N	Y	N	N
B4	CK lrb1lrb2	ACT	UNKNOWN	SYBR	None				23.5171	22.4959	0.957477							TRUE	0.0672595	TRUE	3	21	1	80.2				N	Y	N	N
B5	ABA WT	ACT	UNKNOWN	SYBR	None				20.3235	19.7675	0.694744							TRUE	0.0672595	TRUE	3	18	1	80				N	Y	N	N
B6	ABA lrb1	ACT	UNKNOWN	SYBR	None				19.3981	19.2907	0.194492							TRUE	0.0672595	TRUE	3	17	1	80				N	N	N	N
B7	ABA lrb2	ACT	UNKNOWN	SYBR	None				18.8313	20.2294	1.41057							TRUE	0.0672595	TRUE	3	17	1	80				N	Y	N	N
B8	ABA lrb1lrb2	ACT	UNKNOWN	SYBR	None				21.0432	20.5776	1.05896							TRUE	0.0672595	TRUE	3	19	1	80				N	Y	N	N
B9	ABA WT	ACT	UNKNOWN	SYBR	None				20.4278	19.7675	0.694744							TRUE	0.0672595	TRUE	3	16	1	79.8				N	Y	N	N
B10	ABA lrb1	ACT	UNKNOWN	SYBR	None				19.3691	19.2907	0.194492							TRUE	0.0672595	TRUE	3	17	1	79.8				N	N	N	N
B11	ABA lrb2	ACT	UNKNOWN	SYBR	None				21.0774	20.2294	1.41057							TRUE	0.0672595	TRUE	3	19	1	79.6				N	Y	N	N
B12	ABA lrb1lrb2	ACT	UNKNOWN	SYBR	None				20.8817	20.5776	1.05896							TRUE	0.0672595	TRUE	3	19	1	79.4				N	Y	N	N
C1	CK WT	ACT	UNKNOWN	SYBR	None				23.1082	22.1025	1.03463							TRUE	0.0672595	TRUE	3	21	1	79.8				N	Y	N	N
C2	CK lrb1	ACT	UNKNOWN	SYBR	None				21.6376	21.3997	0.550097							TRUE	0.0672595	TRUE	3	19	1	80				N	Y	N	N
C3	CK lrb2	ACT	UNKNOWN	SYBR	None				21.4089	20.9022	1.06195							TRUE	0.0672595	TRUE	3	19	1	80.2				N	Y	N	N
C4	CK lrb1lrb2	ACT	UNKNOWN	SYBR	None				23.3466	22.4959	0.957477							TRUE	0.0672595	TRUE	3	21	1	80.4				N	Y	N	N
C5	ABA WT	ACT	UNKNOWN	SYBR	None				19.4791	19.7675	0.694744							TRUE	0.0672595	TRUE	3	17	1	80.4				N	Y	N	N
C6	ABA lrb1	ACT	UNKNOWN	SYBR	None				18.976	19.2907	0.194492							TRUE	0.0672595	TRUE	3	17	1	80.2				N	N	N	N
C7	ABA lrb2	ACT	UNKNOWN	SYBR	None				18.6045	20.2294	1.41057							TRUE	0.0672595	TRUE	3	16	1	80.2				N	Y	N	N
C8	ABA lrb1lrb2	ACT	UNKNOWN	SYBR	None				20.2245	20.5776	1.05896							TRUE	0.0672595	TRUE	3	18	1	80.2				N	Y	N	N
C9	ABA WT	ABI3	UNKNOWN	SYBR	None	0.997142	0.562198	1.76858	25.1128	26.1959	0.117457		6.42842	0.321608			0.0041296	TRUE	0.0242985	TRUE	3	25	1	82				N	N	N	N
C10	ABA lrb1	ABI3	UNKNOWN	SYBR	None	0.376228	0.242402	0.583937	26.8944	27.1253	0.326508		7.83461	0.246717			1.41032	TRUE	0.0242985	TRUE	3	25	1	81.6				N	N	N	N
C11	ABA lrb2	ABI3	UNKNOWN	SYBR	None	0.545637	0.0816978	3.64416	28.3866	27.5276	1.21479		7.29827	1.06574			0.873987	TRUE	0.0242985	TRUE	3	27	1	81.6				N	Y	N	N
C12	ABA lrb1lrb2	ABI3	UNKNOWN	SYBR	None	0.458967	0.0872911	2.4132	28.9276	28.1254	1.13438		7.54782	0.931495			1.12354	TRUE	0.0242985	TRUE	3	27	1	81.4				N	Y	N	N
D1	CK WT	ABI1	UNKNOWN	SYBR	None	1	0.449044	2.22695	28.1702	28.3402	0.161944		6.23771	0.472052			0	TRUE	0.112753	TRUE	3	26	1	82				N	N	N	N
D2	CK lrb1	ABI1	UNKNOWN	SYBR	None	2.10757	1.22052	3.63932	26.9159	26.5618	0.360041		5.16213	0.322073			-1.07558	TRUE	0.112753	TRUE	3	24	1	82.2				N	N	N	N
D3	CK lrb2	ABI1	UNKNOWN	SYBR	None	1.77498	0.76302	4.12907	26.0287	26.3121	0.258251		5.40991	0.497775			-0.827804	TRUE	0.112753	TRUE	3	22	1	82.4				N	N	N	N
D4	CK lrb1lrb2	ABI1	UNKNOWN	SYBR	None	0.819486	0.312158	2.15134	29.1471	29.0208	0.649178		6.52492	0.569061			0.287209	TRUE	0.112753	TRUE	3	25	1	82.4				N	Y	N	N
D5	ABA WT	ABI1	UNKNOWN	SYBR	None	0.890213	0.503681	1.57338	26.3448	26.173	0.220585		6.40549	0.335787			0.167777	TRUE	0.112753	TRUE	3	22	1	82.6				N	N	N	N
D6	ABA lrb1	ABI1	UNKNOWN	SYBR	None	1.47613	0.86431	2.52104	25.4281	24.9666	0.525432		5.67589	0.315582			-0.561821	TRUE	0.112753	TRUE	3	21	1	82.6				N	Y	N	N
D7	ABA lrb2	ABI1	UNKNOWN	SYBR	None	1.22304	0.366592	4.08034	26.7465	26.1766	0.565743		5.94725	0.710373			-0.290468	TRUE	0.112753	TRUE	3	23	1	82.4				N	Y	N	N
D8	ABA lrb1lrb2	ABI1	UNKNOWN	SYBR	None	1.57144	0.630016	3.91961	26.6669	26.1632	0.445405		5.58563	0.538893			-0.652086	TRUE	0.112753	TRUE	3	24	1	82.4				N	N	N	N
D9	ABA WT	ABI3	UNKNOWN	SYBR	None	0.997142	0.562198	1.76858	26.279	26.1959	0.117457		6.42842	0.321608			0.0041296	TRUE	0.0242985	TRUE	3	25	1	82				N	N	N	N
D10	ABA lrb1	ABI3	UNKNOWN	SYBR	None	0.376228	0.242402	0.583937	27.3562	27.1253	0.326508		7.83461	0.246717			1.41032	TRUE	0.0242985	TRUE	3	26	1	81.8				N	N	N	N
D11	ABA lrb2	ABI3	UNKNOWN	SYBR	None	0.545637	0.0816978	3.64416	26.6686	27.5276	1.21479		7.29827	1.06574			0.873987	TRUE	0.0242985	TRUE	3	25	1	81.6				N	Y	N	N
D12	ABA lrb1lrb2	ABI3	UNKNOWN	SYBR	None	0.458967	0.0872911	2.4132	27.3233	28.1254	1.13438		7.54782	0.931495			1.12354	TRUE	0.0242985	TRUE	3	25	1	81.4				N	Y	N	N
E1	CK WT	ABI1	UNKNOWN	SYBR	None	1	0.449044	2.22695	28.3577	28.3402	0.161944		6.23771	0.472052			0	TRUE	0.112753	TRUE	3	26	1	82.2				N	N	N	N
E2	CK lrb1	ABI1	UNKNOWN	SYBR	None	2.10757	1.22052	3.63932	26.5734	26.5618	0.360041		5.16213	0.322073			-1.07558	TRUE	0.112753	TRUE	3	23	1	82.2				N	N	N	N
E3	CK lrb2	ABI1	UNKNOWN	SYBR	None	1.77498	0.76302	4.12907	26.5342	26.3121	0.258251		5.40991	0.497775			-0.827804	TRUE	0.112753	TRUE	3	22	1	82.4				N	N	N	N
E4	CK lrb1lrb2	ABI1	UNKNOWN	SYBR	None	0.819486	0.312158	2.15134	28.3178	29.0208	0.649178		6.52492	0.569061			0.287209	TRUE	0.112753	TRUE	3	24	1	82.6				N	Y	N	N
E5	ABA WT	ABI1	UNKNOWN	SYBR	None	0.890213	0.503681	1.57338	26.2499	26.173	0.220585		6.40549	0.335787			0.167777	TRUE	0.112753	TRUE	3	22	1	82.6				N	N	N	N
E6	ABA lrb1	ABI1	UNKNOWN	SYBR	None	1.47613	0.86431	2.52104	25.0768	24.9666	0.525432		5.67589	0.315582			-0.561821	TRUE	0.112753	TRUE	3	21	1	82.6				N	Y	N	N
E7	ABA lrb2	ABI1	UNKNOWN	SYBR	None	1.22304	0.366592	4.08034	26.1681	26.1766	0.565743		5.94725	0.710373			-0.290468	TRUE	0.112753	TRUE	3	22	1	82.6				N	Y	N	N
E8	ABA lrb1lrb2	ABI1	UNKNOWN	SYBR	None	1.57144	0.630016	3.91961	26.0018	26.1632	0.445405		5.58563	0.538893			-0.652086	TRUE	0.112753	TRUE	3	22	1	82.4				N	N	N	N
F1	CK WT	ABI1	UNKNOWN	SYBR	None	1	0.449044	2.22695	28.4927	28.3402	0.161944		6.23771	0.472052			0	TRUE	0.112753	TRUE	3	26	1	82				N	N	N	N
F2	CK 66	ABI1	UNKNOWN	SYBR	None	2.10757	1.22052	3.63932	26.1961	26.5618	0.360041		5.16213	0.322073			-1.07558	TRUE	0.112753	TRUE	3	22	1	82.4				N	N	N	N
F3	CK 905	ABI1	UNKNOWN	SYBR	None	1.77498	0.76302	4.12907	26.3735	26.3121	0.258251		5.40991	0.497775			-0.827804	TRUE	0.112753	TRUE	3	22	1	82.4				N	N	N	N
F4	CK SHUANG	ABI1	UNKNOWN	SYBR	None	0.819486	0.312158	2.15134	29.5976	29.0208	0.649178		6.52492	0.569061			0.287209	TRUE	0.112753	TRUE	3	26	1	82.2				N	Y	N	N
F5	ABA WT	ABI1	UNKNOWN	SYBR	None	0.890213	0.503681	1.57338	25.9242	26.173	0.220585		6.40549	0.335787			0.167777	TRUE	0.112753	TRUE	3	22	1	82.2				N	N	N	N
F6	ABA lrb1	ABI1	UNKNOWN	SYBR	None	1.47613	0.86431	2.52104	24.3948	24.9666	0.525432		5.67589	0.315582			-0.561821	TRUE	0.112753	TRUE	3	20	1	82.4				N	Y	N	N
F7	ABA lrb2	ABI1	UNKNOWN	SYBR	None	1.22304	0.366592	4.08034	25.6151	26.1766	0.565743		5.94725	0.710373			-0.290468	TRUE	0.112753	TRUE	3	21	1	82.4				N	Y	N	N
F8	ABA lrb1lrb2	ABI1	UNKNOWN	SYBR	None	1.57144	0.630016	3.91961	25.8211	26.1632	0.445405		5.58563	0.538893			-0.652086	TRUE	0.112753	TRUE	3	22	1	82.2				N	N	N	N
G1	CK WT	ACT	UNKNOWN	SYBR	None				21.569	22.1025	1.03463							TRUE	0.0672595	TRUE	3	18	1	79.8				N	Y	N	N
G2	CK lrb1	ACT	UNKNOWN	SYBR	None				20.0875	21.3997	0.550097							TRUE	0.0672595	TRUE	3	18	1	80				N	Y	N	N
G3	CK lrb2	ACT	UNKNOWN	SYBR	None				19.2994	20.9022	1.06195							TRUE	0.0672595	TRUE	3	16	1	80.2				N	Y	N	N
G4	CK lrb1lrb2	ACT	UNKNOWN	SYBR	None				20.8091	22.4959	0.957477							TRUE	0.0672595	TRUE	3	18	1	80.2				N	Y	N	N
G5	CK WT	ABI3	UNKNOWN	SYBR	None	1	0.256981	3.89134	27.9206	28.5268	0.857241		6.42429	0.762576			0	TRUE	0.0242985	TRUE	3	26	1	81.8				N	Y	N	N
G6	CK lrb1	ABI3	UNKNOWN	SYBR	None	1.06587	0.647912	1.75346	27.5995	27.7319	0.187249		6.33225	0.279379			-0.0920347	TRUE	0.0242985	TRUE	3	25	1	82				N	N	N	N
G7	CK lrb2	ABI3	UNKNOWN	SYBR	None	0.971201	0.239919	3.93146	26.744	27.3687	0.883468		6.46645	0.784734			0.0421585	TRUE	0.0242985	TRUE	3	25	1	82				N	Y	N	N
G8	CK lrb1lrb2	ABI3	UNKNOWN	SYBR	None	1.4156	0.483535	4.14431	27.9944	28.4188	0.600162		5.92287	0.602868			-0.501413	TRUE	0.0242985	TRUE	3	26	1	81.8				N	Y	N	N
G12	ddH2O	ABI1	NTC	SYBR	None				33.7382									TRUE	0.112753	TRUE	3	31	1	81				Y	N	N	N
H1	CK WT	ACT	UNKNOWN	SYBR	None				20.6092	22.1025	1.03463							TRUE	0.0672595	TRUE	3	17	1	79.6				N	Y	N	N
H2	CK lrb1	ACT	UNKNOWN	SYBR	None				20.151	21.3997	0.550097							TRUE	0.0672595	TRUE	3	18	1	79.8				N	Y	N	N
H3	CK lrb2	ACT	UNKNOWN	SYBR	None				20.3626	20.9022	1.06195							TRUE	0.0672595	TRUE	3	17	1	80				N	Y	N	N
H4	CK lrb1lrb2	ACT	UNKNOWN	SYBR	None				20.7948	22.4959	0.957477							TRUE	0.0672595	TRUE	3	19	1	80				N	Y	N	N
H5	CK WT	ABI3	UNKNOWN	SYBR	None	1	0.256981	3.89134	29.1329	28.5268	0.857241		6.42429	0.762576			0	TRUE	0.0242985	TRUE	3	27	1	81.6				N	Y	N	N
H6	CK lrb1	ABI3	UNKNOWN	SYBR	None	1.06587	0.647912	1.75346	27.8643	27.7319	0.187249		6.33225	0.279379			-0.0920347	TRUE	0.0242985	TRUE	3	26	1	81.8				N	N	N	N
H7	CK lrb2	ABI3	UNKNOWN	SYBR	None	0.971201	0.239919	3.93146	27.9934	27.3687	0.883468		6.46645	0.784734			0.0421585	TRUE	0.0242985	TRUE	3	26	1	81.8				N	Y	N	N
H8	CK lrb1lrb2	ABI3	UNKNOWN	SYBR	None	1.4156	0.483535	4.14431	28.8432	28.4188	0.600162		5.92287	0.602868			-0.501413	TRUE	0.0242985	TRUE	3	26	1	81.6				N	Y	N	N
H12	ddH2O	ABI3	NTC	SYBR	None				Undetermined									TRUE	0.0242985	TRUE	3	39	1	85.2				N	N	N	N
Analysis Type	Singleplex
Endogenous Control	ACT
RQ Min/Max Confidence Level	95.0
Reference Sample	CK WT

## Sheet: Sheet1
				ACT			ACT average value	ABI3			AV	STER
		CK WT		21.569	20.6092		21.0891	27.9206	29.1329		1	0
		CK lrr1-1		20.0875	20.151		20.1192	27.5995	27.8643		0.933942	0.418779
		CK kin7		19.2994	20.3626		19.831	26.744	27.9934		0.933093	0.0169618
		CK lrr1kin7		20.8091	20.7948		20.8019	27.9944	28.8432		0.890206	0.157795
		ABA WT		20.3712	20.4278		20.3995	25.1128	26.279		4.41201	0.0999252
		ABA lrr1-1		19.2405	19.3691		19.3048	26.8944	27.3562		1.96027	0.522124
		ABA kin7		21.6907	21.0774		21.384	28.3866	26.6686		2.13201	0.167023
		ABA lrr1kin7		21.7773	20.8817		21.3295	28.9276	27.3233		0.859886	0.0673638
										WT	lrr1-1	kin7	lrr1kin7
									CK	1	0.933942	0.933093	0.890206
									0.8 μΜ ABA	4.41201	1.96027	2.13201	0.859886
									STER	0	0.418779	0.0169618	0.157795
										0.0999252	0.522124	0.167023	0.0673638
