# Supplementary material for: LRR1 involved in the abscisic acid signaling pathway to regulate the early growth and development of Arabidopsis thaliana
Source: PeerJ. 2024 Nov 26;12:e18460. doi: 10.7717/peerj.18460 (PMC11606324; doi:10.7717/peerj.18460)
Supplement: Supplemental Information 5 [file peerj-12-18460-s005.xls]

## Sheet: Results
Block Type	96alum
Chemistry	SYBR_GREEN
Experiment File Name-----Data 5 LRB1 Regulates ABA-induced Gene Expression data, 5 μM (±) ABA treatmentABI3
Experiment Run End Time	Not Started
Instrument Type	sds7500
Passive Reference	ROX
Well	Sample Name	Target Name	Cт	Cт Mean	Cт SD	ΔCт	ΔCт Mean	ΔCт SE	HK Control ΔCт Mean	HK Control ΔCт SE	ΔΔCт	Automatic Ct Threshold	Ct Threshold	Automatic Baseline	Baseline Start	Baseline End	Efficiency	Tm1	Tm2	Tm3	Comments	HIGHSD	NOAMP	EXPFAIL
A1	ck wt	act	33.2444	33.4572	0.300984							TRUE	0.204438	TRUE	3	28	1	78.0346				N	N	N
A2	ck lrb1	act	33.8143	33.6862	0.243103							TRUE	0.204438	TRUE	3	29	1	78.0346				N	N	N
A3	ck lrb2	act	35.5575	32.8663	0.977534							TRUE	0.204438	TRUE	3	29	1	78.2201				Y	N	N
A4	ck lrb1lrb2	act	33.0695	35.0072	0.0880997							TRUE	0.204438	TRUE	3	30	1	78.2201				N	N	N
A5	1 wt	act	36.7257	36.6207	0.148467							TRUE	0.204438	TRUE	3	31	1	78.4056				N	N	N
A6	1 lrb1	act	36.9419	36.938	0.00559171							TRUE	0.204438	TRUE	3	32	1	78.2201				N	N	N
A7	1 lrb2	act	34.709	34.6072	0.14403							TRUE	0.204438	TRUE	3	30	1	78.2201				N	N	N
A8	1 lrb1lrb2	act	36.3049	36.3049								TRUE	0.204438	TRUE	3	32	1	78.2201				N	N	N
A9	5 wt	act	35.647	35.9196	0.102558							TRUE	0.204438	TRUE	3	31	1	78.0346				N	N	N
A10	5 lrb1	act	34.8148	34.6839	0.185131							TRUE	0.204438	TRUE	3	30	1	77.8492				N	N	N
A11	5 lrb2	act	34.7054	34.6938	0.0164406							TRUE	0.204438	TRUE	3	30	1	77.8492				N	N	N
A12	5 lrb1lrb2	act	35.2885	35.1039	0.26107							TRUE	0.204438	TRUE	3	30	1	77.4782				N	N	N
B1	ck wt	act	33.6701	33.4572	0.300984							TRUE	0.204438	TRUE	3	29	1	78.2201				N	N	N
B2	ck lrb1	act	33.8581	33.6862	0.243103							TRUE	0.204438	TRUE	3	29	1	78.4056				N	N	N
B3	ck lrb2	act	35.1751	32.8663	0.977534							TRUE	0.204438	TRUE	3	27	1	78.4056				Y	N	N
B4	ck lrb1lrb2	act	32.9449	35.0072	0.0880997							TRUE	0.204438	TRUE	3	30	1	78.5911				N	N	N
B5	1 wt	act	36.5157	36.6207	0.148467							TRUE	0.204438	TRUE	3	32	1	78.5911				N	N	N
B6	1 lrb1	act	36.934	36.938	0.00559171							TRUE	0.204438	TRUE	3	31	1	78.5911				N	N	N
B7	1 lrb2	act	34.5053	34.6072	0.14403							TRUE	0.204438	TRUE	3	30	1	78.4056				N	N	N
B8	1 lrb1lrb2	act	Undetermined	36.3049								TRUE	0.204438	TRUE	3	39	1	62.2693				N	Y	Y
B9	5 wt	act	35.5921	35.9196	0.102558							TRUE	0.204438	TRUE	3	31	1	78.4056				N	N	N
B10	5 lrb1	act	34.553	34.6839	0.185131							TRUE	0.204438	TRUE	3	30	1	78.2201				N	N	N
B11	5 lrb2	act	34.6822	34.6938	0.0164406							TRUE	0.204438	TRUE	3	29	1	78.0346				N	N	N
B12	5 lrb1lrb2	act	34.9193	35.1039	0.26107							TRUE	0.204438	TRUE	3	31	1	77.4782				N	N	N
C1	ck wt	abi5	34.499	34.499			1.04175				0	TRUE	0.0204487	TRUE	3	33	1	70.6156				N	N	N
C2	ck lrb1	abi5	Undetermined	37.4239			3.73767				2.69592	TRUE	0.0204487	TRUE	3	38	1	70.6156				N	N	Y
C3	ck lrb2	abi5	37.2532	37.2532			4.38688				3.34513	TRUE	0.0204487	TRUE	3	35	1	70.6156				N	N	N
C4	ck lrb1lrb2	abi5	36.7481	36.7481			1.74089				0.699139	TRUE	0.0204487	TRUE	3	35	1	75.2525				N	N	N
C5	1 wt	abi5	36.4057	36.4057			-0.215025				-1.25677	TRUE	0.0204487	TRUE	3	35	1	70.8011				N	N	N
C6	1 lrb1	abi5	Undetermined	37.3705			0.432581				-0.609169	TRUE	0.0204487	TRUE	3	39	1	62.0838				N	Y	Y
C7	1 lrb2	abi5	Undetermined									TRUE	0.0204487	TRUE	3	38	1	70.8011				N	N	Y
C8	1 lrb1lrb2	abi5	Undetermined									TRUE	0.0204487	TRUE	3	39	1	62.4547				N	Y	Y
C9	5 wt	abi5	Undetermined	36.9171			0.997511				-0.044239	TRUE	0.0204487	TRUE	3	39	1	62.4547				N	Y	Y
C10	5 lrb1	abi5	Undetermined									TRUE	0.0204487	TRUE	3	39	1	63.0112				N	Y	Y
C11	5 lrb2	abi5	Undetermined									TRUE	0.0204487	TRUE	3	39	1	63.0112				N	N	Y
C12	5 lrb1lrb2	abi5	Undetermined									TRUE	0.0204487	TRUE	3	39	1	62.2693				N	Y	Y
D1	ck wt	abi5	Undetermined	34.499			1.04175				0	TRUE	0.0204487	TRUE	3	39	1	63.1966				N	Y	Y
D2	ck lrb1	abi5	37.4239	37.4239			3.73767				2.69592	TRUE	0.0204487	TRUE	3	35	1	71.7285				N	N	N
D3	ck lrb2	abi5	Undetermined	37.2532			4.38688				3.34513	TRUE	0.0204487	TRUE	3	39	1	62.4547				N	Y	Y
D4	ck lrb1lrb2	abi5	Undetermined	36.7481			1.74089				0.699139	TRUE	0.0204487	TRUE	3	39	1	62.8257				N	Y	Y
D5	1 wt	abi5	Undetermined	36.4057			-0.215025				-1.25677	TRUE	0.0204487	TRUE	3	39	1	62.4547				N	Y	Y
D6	1 lrb1	abi5	37.3705	37.3705			0.432581				-0.609169	TRUE	0.0204487	TRUE	3	35	1	70.9866				N	N	N
D7	1 lrb2	abi5	Undetermined									TRUE	0.0204487	TRUE	3	39	1	62.0838				N	Y	Y
D8	1 lrb1lrb2	abi5	Undetermined									TRUE	0.0204487	TRUE	3	39	1	62.6402				N	Y	Y
D9	5 wt	abi5	36.9171	36.9171			0.997511				-0.044239	TRUE	0.0204487	TRUE	3	35	1	70.8011				N	N	N
D10	5 lrb1	abi5	Undetermined									TRUE	0.0204487	TRUE	3	39	1	62.8257				N	Y	Y
D11	5 lrb2	abi5	Undetermined									TRUE	0.0204487	TRUE	3	39	1	61.8983				N	Y	Y
D12	5 lrb1lrb2	abi5	Undetermined									TRUE	0.0204487	TRUE	3	39	1	63.3821				N	Y	Y
E1	ck wt	abi3	33.6306	33.0438	0.829903		-0.413458	0.624232			0	TRUE	0.0286503	TRUE	3	32	1	72.2849				Y	N	N
E2	ck lrb1	abi3	33.6941	33.7762	0.82313		0.0899582	0.606895			0.503416	TRUE	0.0286503	TRUE	3	31	1	72.2849				Y	N	N
E3	ck lrb2	abi3	35.2407	37.2526	2.84529		4.38627	2.12735			4.79973	TRUE	0.0286503	TRUE	3	33	1	72.4704				Y	N	N
E4	ck lrb1lrb2	abi3	32.8072	32.7461	0.620733		-2.26112	0.443324			-1.84766	TRUE	0.0286503	TRUE	3	30	1	72.4704				Y	N	N
E5	1 wt	abi3	34.1818	34.6211	0.621257		-1.99965	0.451665			-1.58619	TRUE	0.0286503	TRUE	3	32	1	72.4704				Y	N	N
E6	1 lrb1	abi3	33.4085	32.9663	0.625357		-3.97168	0.442212			-3.55822	TRUE	0.0286503	TRUE	3	31	1	72.4704				Y	N	N
E7	1 lrb2	abi3	33.6114	34.2181	0.858013		-0.389101	0.615195			0.0243568	TRUE	0.0286503	TRUE	3	32	1	72.4704				Y	N	N
E8	1 lrb1lrb2	abi3	37.0847	34.6737	3.40973		-1.63123				-1.21777	TRUE	0.0286503	TRUE	3	35	1	73.7687				Y	N	N
E9	5 wt	abi3	32.8258	32.639	1.67836		-3.28052	1.18899			-2.86706	TRUE	0.0286503	TRUE	3	32	1	72.2849				Y	N	N
E10	5 lrb1	abi3	30.9071	35.3224	6.24429		0.638512	4.41732			1.05197	TRUE	0.0286503	TRUE	3	29	1	72.2849				Y	N	N
E11	5 lrb2	abi3	31.5643	33.5056	2.74537		-1.18819	1.94131			-0.774731	TRUE	0.0286503	TRUE	3	29	1	72.0994				Y	N	N
E12	5 lrb1lrb2	abi3	35.9508	35.2889	0.936019		0.185066	0.687128			0.598524	TRUE	0.0286503	TRUE	3	34	1	71.7285				Y	N	N
F1	ck wt	abi3	32.4569	33.0438	0.829903		-0.413458	0.624232			0	TRUE	0.0286503	TRUE	3	30	1	71.914				Y	N	N
F2	ck lrb1	abi3	34.3582	33.7762	0.82313		0.0899582	0.606895			0.503416	TRUE	0.0286503	TRUE	3	32	1	72.0994				Y	N	N
F3	ck lrb2	abi3	35.2645	37.2526	2.84529		4.38627	2.12735			4.79973	TRUE	0.0286503	TRUE	3	35	1	73.2123				Y	N	N
F4	ck lrb1lrb2	abi3	33.185	32.7461	0.620733		-2.26112	0.443324			-1.84766	TRUE	0.0286503	TRUE	3	31	1	72.2849				Y	N	N
F5	1 wt	abi3	35.0604	34.6211	0.621257		-1.99965	0.451665			-1.58619	TRUE	0.0286503	TRUE	3	33	1	72.2849				Y	N	N
F6	1 lrb1	abi3	32.5241	32.9663	0.625357		-3.97168	0.442212			-3.55822	TRUE	0.0286503	TRUE	3	30	1	72.2849				Y	N	N
F7	1 lrb2	abi3	34.8248	34.2181	0.858013		-0.389101	0.615195			0.0243568	TRUE	0.0286503	TRUE	3	33	1	72.2849				Y	N	N
F8	1 lrb1lrb2	abi3	32.2627	34.6737	3.40973		-1.63123				-1.21777	TRUE	0.0286503	TRUE	3	30	1	72.4704				Y	N	N
F9	5 wt	abi3	31.4523	32.639	1.67836		-3.28052	1.18899			-2.86706	TRUE	0.0286503	TRUE	3	29	1	72.6559				Y	N	N
F10	5 lrb1	abi3	39.7378	35.3224	6.24429		0.638512	4.41732			1.05197	TRUE	0.0286503	TRUE	3	35	1	71.7285				Y	N	N
F11	5 lrb2	abi3	35.4469	33.5056	2.74537		-1.18819	1.94131			-0.774731	TRUE	0.0286503	TRUE	3	33	1	71.3575				Y	N	N
F12	5 lrb1lrb2	abi3	34.6271	35.2889	0.936019		0.185066	0.687128			0.598524	TRUE	0.0286503	TRUE	3	33	1	71.543				Y	N	N
G1	ck wt	abi2	35.3213	35.5623	0.3409		2.10511	0.321562			0	TRUE	0.0304341	TRUE	3	33	1	79.5184				N	N	N
G2	ck lrb1	abi2	37.4038	37.1417	0.370703		3.45547	0.313465			1.35036	TRUE	0.0304341	TRUE	3	35	1	79.5184				N	N	N
G3	ck lrb1	abi2	35.829	35.6419	0.264547		2.7756	0.716086			0.670486	TRUE	0.0304341	TRUE	3	34	1	79.5184				N	N	N
G4	ck lrb1lrb2	abi2	35.8346	35.6939	0.199011		0.686626	0.153895			-1.41848	TRUE	0.0304341	TRUE	3	34	1	79.7039				N	N	N
G5	1 wt	abi2	35.2814	35.0825	0.281233		-1.5382	0.224872			-3.64331	TRUE	0.0304341	TRUE	3	33	1	79.7039				N	N	N
G6	1 lrb1	abi2	37.1635	37.0726	0.128499		0.134653	0.0909483			-1.97046	TRUE	0.0304341	TRUE	3	35	1	79.7039				N	N	N
G7	1 lrb2	abi2	34.3055	33.9579	0.491488		-0.649261	0.36215			-2.75437	TRUE	0.0304341	TRUE	3	32	1	79.5184				N	N	N
G8	1 lrb1lrb2	abi2	35.7741	35.7797	0.00790068		-0.525236				-2.63035	TRUE	0.0304341	TRUE	3	34	1	79.5184				N	N	N
G9	5 wt	abi2	35.227	35.2348	0.011089		-0.684719	0.072942			-2.78983	TRUE	0.0304341	TRUE	3	33	1	79.5184				N	N	N
G10	5 lrb1	abi2	34.2005	34.2725	0.101886		-0.411386	0.149422			-2.5165	TRUE	0.0304341	TRUE	3	32	1	79.333				N	N	N
G11	5 905	abi2	35.0037	35.0877	0.118772		0.393911	0.0847852			-1.7112	TRUE	0.0304341	TRUE	3	33	1	79.1475				N	N	N
G12	5 lrb1lrb2	abi2	34.9585	35.059	0.142083		-0.0448914	0.210173			-2.15	TRUE	0.0304341	TRUE	3	33	1	78.962				N	N	N
H1	ck wt	abi2	35.8034	35.5623	0.3409		2.10511	0.321562			0	TRUE	0.0304341	TRUE	3	33	1	79.333				N	N	N
H2	ck lrb1	abi2	36.8795	37.1417	0.370703		3.45547	0.313465			1.35036	TRUE	0.0304341	TRUE	3	35	1	79.5184				N	N	N
H3	ck lrb2	abi2	35.4548	35.6419	0.264547		2.7756	0.716086			0.670486	TRUE	0.0304341	TRUE	3	34	1	79.5184				N	N	N
H4	ck lrb1lrb2	abi2	35.5531	35.6939	0.199011		0.686626	0.153895			-1.41848	TRUE	0.0304341	TRUE	3	34	1	79.5184				N	N	N
H5	1 wt	abi2	34.8837	35.0825	0.281233		-1.5382	0.224872			-3.64331	TRUE	0.0304341	TRUE	3	33	1	79.333				N	N	N
H6	1 lrb1	abi2	36.9818	37.0726	0.128499		0.134653	0.0909483			-1.97046	TRUE	0.0304341	TRUE	3	35	1	79.5184				N	N	N
H7	1 905	abi2	33.6104	33.9579	0.491488		-0.649261	0.36215			-2.75437	TRUE	0.0304341	TRUE	3	32	1	79.333				N	N	N
H8	1 lrb1lrb2	abi2	35.7853	35.7797	0.00790068		-0.525236				-2.63035	TRUE	0.0304341	TRUE	3	34	1	79.1475				N	N	N
H9	5 wt	abi2	35.2427	35.2348	0.011089		-0.684719	0.072942			-2.78983	TRUE	0.0304341	TRUE	3	33	1	79.1475				N	N	N
H10	5 lrb1	abi2	34.3446	34.2725	0.101886		-0.411386	0.149422			-2.5165	TRUE	0.0304341	TRUE	3	32	1	79.1475				N	N	N
H11	5 lrb2	abi2	35.1717	35.0877	0.118772		0.393911	0.0847852			-1.7112	TRUE	0.0304341	TRUE	3	33	1	78.962				N	N	N
H12	5 lrb1lrb2	abi2	35.1594	35.059	0.142083		-0.0448914	0.210173			-2.15	TRUE	0.0304341	TRUE	3	34	1	78.962				N	N	N
Analysis Type	Singleplex
Endogenous Control	act
RQ Min/Max Confidence Level	95.0
Reference Sample	ck wt

## Sheet: Sheet1
		Cт
		ACT		ACT AVERAGE		ABI3			AV	STER
	CK WT	33.2444	33.6701	33.4572		33.6306	32.4569		1	0
	CK lrr1-1	33.8143	33.8581	33.8362		33.6941	34.3582		0.796269	0.633759
	CK kin7	35.5575	35.1751	35.3663		35.2407	35.2645		0.88338	0.490634
	CK lrr1kin7	33.0695	32.9449	33.0072		32.8072	33.185		0.868676	0.603503
	ABA WT	35.647	35.5921	35.6196		32.8258	31.4523		8.40078	0.821742
	ABA lrr1-1	34.8148	34.553	34.6839		30.9071	39.7378		1.96027	0.522124
	ABA kin7	34.7054	34.6822	34.6938		31.5643	35.4469		2.13201	0.167023
	ABA lrr1kin7	35.2885	34.9193	35.1039		35.9508	34.6271		0.859886	0.0673638
			ABI3
					WT	lrr1-1	kin7	lrr1kin7
				CK	1	0.796269	0.88338	0.868676
				5 μM ABA	8.40078	1.96027	2.13201	0.859886
				STER	0	0.633759	0.490634	0.603503
					0.821742	0.522124	0.167023	0.0673638
