# Supplementary material for: LRR1 involved in the abscisic acid signaling pathway to regulate the early growth and development of Arabidopsis thaliana
Source: PeerJ. 2024 Nov 26;12:e18460. doi: 10.7717/peerj.18460 (PMC11606324; doi:10.7717/peerj.18460)
Supplement: Supplemental Information 6 [file peerj-12-18460-s006.xls]

## Sheet: Results
Block Type	96alum
Chemistry	SYBR_GREEN
Experiment File Name-----Data 6 LRB1 Regulates ABA-induced Gene Expression data, 0.8 μM (±) ABA treatmentABI4
Experiment Run End Time	2017-05-10 16:35:29
Instrument Type	sds7500
Passive Reference	ROX
Well	Sample Name	Target Name	Task	Reporter	Quencher	RQ	RQ Min	RQ Max	Cт	Cт Mean	Cт SD	ΔCт	ΔCт Mean	ΔCт SE	HK Control ΔCт Mean	HK Control ΔCт SE	ΔΔCт	Automatic Ct Threshold	Ct Threshold	Automatic Baseline	Baseline Start	Baseline End	Efficiency	Tm1	Tm2	Tm3	Comments	AMPNC	HIGHSD	MTP
A1	CK WT	act	UNKNOWN	SYBR	None				21.451	21.9348	0.570803							TRUE	0.0551813	TRUE	3	19	1	79.7414				N	Y	N
A2	CK lrb1	act	UNKNOWN	SYBR	None				21.4353	21.6978	0.711087							TRUE	0.0551813	TRUE	3	20	1	79.542				N	Y	N
A3	CK lrb2	act	UNKNOWN	SYBR	None				24.212	22.1624	1.69305							TRUE	0.0551813	TRUE	3	21	1	68.1757	79.9408			N	Y	Y
A4	CK lrb1lrb2	act	UNKNOWN	SYBR	None				23.0124	23.077	0.439815							TRUE	0.0551813	TRUE	3	21	1	79.7414				N	N	N
A9	CK WT	act	UNKNOWN	SYBR	None				22.5896	21.9348	0.570803							TRUE	0.0551813	TRUE	3	21	1	79.542				N	Y	N
A10	CK lrb1	act	UNKNOWN	SYBR	None				19.1796	21.6978	0.711087							TRUE	0.0551813	TRUE	3	21	1	79.3426				N	Y	N
A11	CK lrb2	act	UNKNOWN	SYBR	None				20.3483	22.1624	1.69305							TRUE	0.0551813	TRUE	3	21	1	79.3426				N	Y	N
A12	CK lrb1lrb2	act	UNKNOWN	SYBR	None				21.1032	23.077	0.439815							TRUE	0.0551813	TRUE	3	22	1	78.9438				N	N	N
B1	CK WT	act	UNKNOWN	SYBR	None				22.2367	21.9348	0.570803							TRUE	0.0551813	TRUE	3	21	1	79.7414				N	Y	N
B2	CK lrb1	act	UNKNOWN	SYBR	None				21.0024	21.6978	0.711087							TRUE	0.0551813	TRUE	3	19	1	79.9408				N	Y	N
B3	CK lrb2	act	UNKNOWN	SYBR	None				20.0789	22.1624	1.69305							TRUE	0.0551813	TRUE	3	18	1	79.9408				N	Y	N
B4	CK lrb1lrb2	act	UNKNOWN	SYBR	None				22.6813	23.077	0.439815							TRUE	0.0551813	TRUE	3	21	1	80.1402				N	N	N
B9	CK WT	act	UNKNOWN	SYBR	None				21.462	21.9348	0.570803							TRUE	0.0551813	TRUE	3	19	1	79.9408				N	Y	N
B10	CK lrb1	act	UNKNOWN	SYBR	None				19.174	21.6978	0.711087							TRUE	0.0551813	TRUE	3	20	1	79.9408				N	Y	N
B11	CK lrb2	act	UNKNOWN	SYBR	None				20.0105	22.1624	1.69305							TRUE	0.0551813	TRUE	3	20	1	79.7414				N	Y	N
B12	CK lrb1lrb2	act	UNKNOWN	SYBR	None				20.9113	23.077	0.439815							TRUE	0.0551813	TRUE	3	21	1	79.542				N	N	N
C1	CK WT	ABI2	UNKNOWN	SYBR	None	1	0.551344	1.81375	28.3266	28.2072	0.16889		6.27241	0.30938			0	TRUE	0.0647837	TRUE	3	26	1	82.5331				N	N	N
C2	CK lrb1	ABI2	UNKNOWN	SYBR	None	2.99939	1.48516	6.05746	26.4691	26.3856	0.118178		4.68774	0.365232			-1.58467	TRUE	0.0647837	TRUE	3	24	1	82.932				N	N	N
C3	CK lrb2	ABI2	UNKNOWN	SYBR	None	4.5004	0.625175	32.3967	26.8439	26.2648	0.819019		4.10235	1.02567			-2.17005	TRUE	0.0647837	TRUE	3	24	1	83.1314				N	Y	N
C4	CK lrb1lrb2	ABI2	UNKNOWN	SYBR	None	4.02875	1.78499	9.09297	27.7004	27.3391	0.511007		4.26207	0.422994			-2.01033	TRUE	0.0647837	TRUE	3	25	1	83.1314				N	Y	N
C9	CK WT	ABI4	UNKNOWN	SYBR	None	1	0.340711	2.93504	30.6752	30.194	0.680544		8.25919	0.559486			0	TRUE	0.0805531	TRUE	3	28	1	83.7296				N	Y	N
C10	CK lrb1	ABI4	UNKNOWN	SYBR	None	5.91647	2.51268	13.9312	27.6599	27.3923	0.37845		5.69446	0.444998			-2.56474	TRUE	0.0805531	TRUE	3	25	1	83.7296				N	N	N
C11	CK lrb2	ABI4	UNKNOWN	SYBR	None	3.9208	0.61886	24.8403	28.9018	28.4505	0.638222		6.28804	0.959307			-1.97115	TRUE	0.0805531	TRUE	3	26	1	83.5302				N	Y	N
C12	CK lrb1lrb2	ABI4	UNKNOWN	SYBR	None	4.68409	1.96751	11.1515	29.5019	29.1085	0.556396		6.03142	0.450719			-2.22777	TRUE	0.0805531	TRUE	3	27	1	83.3308				N	Y	N
D1	CK WT	ABI2	UNKNOWN	SYBR	None	1	0.551344	1.81375	28.0878	28.2072	0.16889		6.27241	0.30938			0	TRUE	0.0647837	TRUE	3	26	1	83.1314				N	N	N
D2	CK lrb1	ABI2	UNKNOWN	SYBR	None	2.99939	1.48516	6.05746	26.302	26.3856	0.118178		4.68774	0.365232			-1.58467	TRUE	0.0647837	TRUE	3	23	1	83.1314				N	N	N
D3	CK lrb2	ABI2	UNKNOWN	SYBR	None	4.5004	0.625175	32.3967	25.6856	26.2648	0.819019		4.10235	1.02567			-2.17005	TRUE	0.0647837	TRUE	3	22	1	83.3308				N	Y	N
D4	CK lrb1lrb2	ABI2	UNKNOWN	SYBR	None	4.02875	1.78499	9.09297	26.9778	27.3391	0.511007		4.26207	0.422994			-2.01033	TRUE	0.0647837	TRUE	3	24	1	83.3308				N	Y	N
D8	ddH2O	act	NTC	SYBR	None				31.299									TRUE	0.0551813	TRUE	3	29	1	82.5331				Y	N	N
D9	CK WT	ABI4	UNKNOWN	SYBR	None	1	0.340711	2.93504	29.7128	30.194	0.680544		8.25919	0.559486			0	TRUE	0.0805531	TRUE	3	27	1	83.929				N	Y	N
D10	CK lrb1	ABI4	UNKNOWN	SYBR	None	5.91647	2.51268	13.9312	27.1247	27.3923	0.37845		5.69446	0.444998			-2.56474	TRUE	0.0805531	TRUE	3	24	1	83.7296				N	N	N
D11	CK lrb2	ABI4	UNKNOWN	SYBR	None	3.9208	0.61886	24.8403	27.9992	28.4505	0.638222		6.28804	0.959307			-1.97115	TRUE	0.0805531	TRUE	3	24	1	83.7296				N	Y	N
D12	CK lrb1lrb2	ABI4	UNKNOWN	SYBR	None	4.68409	1.96751	11.1515	28.715	29.1085	0.556396		6.03142	0.450719			-2.22777	TRUE	0.0805531	TRUE	3	25	1	83.5302				N	Y	N
E1	ABA WT	act	UNKNOWN	SYBR	None				19.0519	18.1266	0.808653							TRUE	0.0551813	TRUE	3	17	1	80.1402				N	Y	N
E2	ABA lrb1	act	UNKNOWN	SYBR	None				17.5168	17.5134	0.420397							TRUE	0.0551813	TRUE	3	14	1	80.3396				N	N	N
E3	ABA lrb2	act	UNKNOWN	SYBR	None				19.9327	18.9478	0.928702							TRUE	0.0551813	TRUE	3	17	1	80.1402				N	Y	N
E4	ABA lrb1lrb2	act	UNKNOWN	SYBR	None				18.0717	19.0834	0.791858							TRUE	0.0551813	TRUE	3	15	1	80.5391				N	Y	N
E8	ddH2O	ABI2	NTC	SYBR	None				31.6814									TRUE	0.0647837	TRUE	3	29	1	79.3426				Y	N	N
E9	ABA WT	act	UNKNOWN	SYBR	None				18.2197	18.1266	0.808653							TRUE	0.0551813	TRUE	3	15	1	80.3396				N	Y	N
E10	ABA lrb1	act	UNKNOWN	SYBR	None				16.9874	17.5134	0.420397							TRUE	0.0551813	TRUE	3	14	1	80.1402				N	N	N
E11	ABA lrb2	act	UNKNOWN	SYBR	None				18.2965	18.9478	0.928702							TRUE	0.0551813	TRUE	3	15	1	79.9408				N	Y	N
E12	ABA lrb1lrb2	act	UNKNOWN	SYBR	None				19.0594	19.0834	0.791858							TRUE	0.0551813	TRUE	3	16	1	79.542				N	Y	N
F1	ABA WT	act	UNKNOWN	SYBR	None				17.0796	18.1266	0.808653							TRUE	0.0551813	TRUE	3	14	1	79.9408				N	Y	N
F2	ABA lrb1	act	UNKNOWN	SYBR	None				17.5328	17.5134	0.420397							TRUE	0.0551813	TRUE	3	14	1	80.3396				N	N	N
F3	ABA lrb2	act	UNKNOWN	SYBR	None				18.0268	18.9478	0.928702							TRUE	0.0551813	TRUE	3	15	1	80.3396				N	Y	N
F4	ABA lrb1lrb2	act	UNKNOWN	SYBR	None				19.2007	19.0834	0.791858							TRUE	0.0551813	TRUE	3	16	1	80.5391				N	Y	N
F9	ABA WT	act	UNKNOWN	SYBR	None				18.1553	18.1266	0.808653							TRUE	0.0551813	TRUE	3	15	1	80.1402				N	Y	N
F10	ABA lrb1	act	UNKNOWN	SYBR	None				18.0166	17.5134	0.420397							TRUE	0.0551813	TRUE	3	15	1	80.1402				N	N	N
F11	ABA lrb2	act	UNKNOWN	SYBR	None				19.5352	18.9478	0.928702							TRUE	0.0551813	TRUE	3	17	1	79.7414				N	Y	N
F12	ABA lrb1lrb2	act	UNKNOWN	SYBR	None				20.0017	19.0834	0.791858							TRUE	0.0551813	TRUE	3	17	1	79.3426				N	Y	N
G1	ABA WT	ABI2	UNKNOWN	SYBR	None	0.984864	0.368715	2.63064	24.7327	24.421	0.440785		6.29441	0.510515			0.0220041	TRUE	0.0647837	TRUE	3	22	1	82.7325				N	N	N
G2	ABA lrb1	ABI2	UNKNOWN	SYBR	None	0.48057	0.319759	0.722254	24.8179	24.843	0.0355409		7.32959	0.211695			1.05718	TRUE	0.0647837	TRUE	3	21	1	82.932				N	N	N
G3	ABA lrb2	ABI2	UNKNOWN	SYBR	None	1.52572	0.3892	5.98102	24.0738	24.6107	0.759326		5.66292	0.709866			-0.609487	TRUE	0.0647837	TRUE	3	21	1	82.932				N	Y	N
G4	ABA lrb1lrb2	ABI2	UNKNOWN	SYBR	None	0.753505	0.350038	1.62202	25.7199	25.7641	0.0625243		6.68072	0.39839			0.408311	TRUE	0.0647837	TRUE	3	22	1	83.1314				N	N	N
G8	ddH2O	ABI4	NTC	SYBR	None				Undetermined									TRUE	0.0805531	TRUE	3	39	1	84.7266				N	N	N
G9	ABA WT	ABI4	UNKNOWN	SYBR	None	2.23492	1.02557	4.87035	24.8068	25.2256	0.0265626		7.09897	0.404762			-1.16022	TRUE	0.0805531	TRUE	3	21	1	83.7296				N	N	N
G10	ABA lrb1	ABI4	UNKNOWN	SYBR	None	1.47978	0.97761	2.2399	25.1602	25.2072	0.0665516		7.69381	0.215402			-0.565382	TRUE	0.0805531	TRUE	3	22	1	83.7296				N	N	N
G11	ABA lrb2	ABI4	UNKNOWN	SYBR	None	2.45975	0.979923	6.17435	25.7941	25.9085	0.161741		6.96068	0.478228			-1.29851	TRUE	0.0805531	TRUE	3	22	1	83.5302				N	N	N
G12	ABA lrb1lrb2	ABI4	UNKNOWN	SYBR	None	2.7052	1.02309	7.15296	26.2207	25.9068	0.443891		6.82346	0.505252			-1.43574	TRUE	0.0805531	TRUE	3	23	1	83.3308				N	N	N
H1	ABA WT	ABI2	UNKNOWN	SYBR	None	0.984864	0.368715	2.63064	24.1094	24.421	0.440785		6.29441	0.510515			0.0220041	TRUE	0.0647837	TRUE	3	21	1	82.5331				N	N	N
H2	ABA lrb1	ABI2	UNKNOWN	SYBR	None	0.48057	0.319759	0.722254	24.8681	24.843	0.0355409		7.32959	0.211695			1.05718	TRUE	0.0647837	TRUE	3	22	1	82.7325				N	N	N
H3	ABA lrb2	ABI2	UNKNOWN	SYBR	None	1.52572	0.3892	5.98102	25.1476	24.6107	0.759326		5.66292	0.709866			-0.609487	TRUE	0.0647837	TRUE	3	22	1	82.7325				N	Y	N
H4	ABA lrb1lrb2	ABI2	UNKNOWN	SYBR	None	0.753505	0.350038	1.62202	25.8083	25.7641	0.0625243		6.68072	0.39839			0.408311	TRUE	0.0647837	TRUE	3	22	1	82.932				N	N	N
H9	ABA WT	ABI4	UNKNOWN	SYBR	None	2.23492	1.02557	4.87035	24.2444	25.2256	0.0265626		7.09897	0.404762			-1.16022	TRUE	0.0805531	TRUE	3	22	1	83.5302				N	N	N
H10	ABA lrb1	ABI4	UNKNOWN	SYBR	None	1.47978	0.97761	2.2399	25.2543	25.2072	0.0665516		7.69381	0.215402			-0.565382	TRUE	0.0805531	TRUE	3	22	1	83.3308				N	N	N
H11	ABA lrb2	ABI4	UNKNOWN	SYBR	None	2.45975	0.979923	6.17435	26.0228	25.9085	0.161741		6.96068	0.478228			-1.29851	TRUE	0.0805531	TRUE	3	23	1	83.3308				N	N	N
H12	ABA lrb1lrb2	ABI4	UNKNOWN	SYBR	None	2.7052	1.02309	7.15296	25.5929	25.9068	0.443891		6.82346	0.505252			-1.43574	TRUE	0.0805531	TRUE	3	22	1	83.1314				N	N	N
Analysis Type	Singleplex
Endogenous Control	act
RQ Min/Max Confidence Level	95.0
Reference Sample	CK WT

## Sheet: Sheet1
			Cт
			ACT		ACT AVERAGE		ABI4			AV	STER
		CK WT	22.5896	21.462	22.0258		30.6752	29.7128		1	0
		CK lrb1-1	19.1796	19.174	19.1768		27.6599	27.1247		0.978411	0.203391
		CK lrb2	20.3483	20.0105	20.1794		28.9018	27.9992		0.931415	0.0273196
		CK lrb1lrb2	21.1032	20.9113	21.0072		29.5019	28.715		1.04948	0.090199
		ABA WT	18.2197	18.1553	18.1875		24.8068	24.2444		3.58994	0.69934
		ABA lrb1-1	16.9874	18.0166	17.502		25.1602	25.2543		1.96027	0.522124
		ABA lrb2	18.2965	19.5352	18.9159		25.7941	26.0228		2.13201	0.167023
		ABA lrb1lrb2	19.0594	20.0017	19.5305		26.2207	25.5929		0.859886	0.0673638
									WT	lrr1-1	kin7	lrr1kin7
								CK	1	0.978411	0.931415	1.04948
								0.8 μM ABA	3.58994	1.96027	2.13201	0.859886
								STER	0	0.203391	0.0273196	0.090199
									0.69934	0.522124	0.167023	0.0673638
