# Supplementary material for: LRR1 involved in the abscisic acid signaling pathway to regulate the early growth and development of Arabidopsis thaliana
Source: PeerJ. 2024 Nov 26;12:e18460. doi: 10.7717/peerj.18460 (PMC11606324; doi:10.7717/peerj.18460)
Supplement: Supplemental Information 7 [file peerj-12-18460-s007.xls]

## Sheet: Results
Block Type	96alum
Chemistry	SYBR_GREEN
Experiment File Name------Data 7 LRB1 Regulates ABA-induced Gene Expression data, 5 μM (±) ABA treatment ABI4
Experiment Run End Time	2015-08-25 11:37:02
Instrument Type	sds7500
Passive Reference	ROX
Well		Cт Mean	Cт SD	ΔCт	ΔCт Mean	ΔCт SE	HK Control ΔCт Mean	HK Control ΔCт SE	ΔΔCт	Automatic Ct Threshold	Ct Threshold	Automatic Baseline	Baseline Start	Baseline End	Efficiency	Tm1	Tm2	Tm3	Comments	HIGHSD	NOAMP	EXPFAIL	MTP
A1		32.5465	0.280966							TRUE	0.0209802	TRUE	3	31	1	78.3371				N	N	N	N
A2		32.0965	0.143546							TRUE	0.0209802	TRUE	3	31	1	78.3371				N	N	N	N
A3		32.6551	0.35146							TRUE	0.0209802	TRUE	3	31	1	78.1486				N	N	N	N
A4		34.1203	0.395269							TRUE	0.0209802	TRUE	3	33	1	78.5257				N	N	N	N
A5		36.6738	0.248031							TRUE	0.0209802	TRUE	3	35	1	78.5257				N	N	N	N
A6		35.944	0.175776							TRUE	0.0209802	TRUE	3	34	1	73.6229	78.7143			N	N	N	Y
A7		36.4603	0.511168							TRUE	0.0209802	TRUE	3	35	1	78.5257				Y	N	N	N
A8		36.2134	0.0848602							TRUE	0.0209802	TRUE	3	35	1	78.5257				N	N	N	N
A9		36.0009	0.555791							TRUE	0.0209802	TRUE	3	35	1	78.3371				Y	N	N	N
A10		34.0606	0.607082							TRUE	0.0209802	TRUE	3	33	1	78.1486				Y	N	N	N
A11		33.0039	0.418385							TRUE	0.0209802	TRUE	3	32	1	78.1486				N	N	N	N
A12		37.4162	0.469102							TRUE	0.0209802	TRUE	3	35	1	78.1486				N	N	N	N
B1		32.5465	0.280966							TRUE	0.0209802	TRUE	3	31	1	78.3371				N	N	N	N
B2		32.0965	0.143546							TRUE	0.0209802	TRUE	3	30	1	78.5257				N	N	N	N
B3		32.6551	0.35146							TRUE	0.0209802	TRUE	3	31	1	78.5257				N	N	N	N
B4		34.1203	0.395269							TRUE	0.0209802	TRUE	3	32	1	78.7143				N	N	N	N
B5		36.6738	0.248031							TRUE	0.0209802	TRUE	3	35	1	78.9029				N	N	N	N
B6		35.944	0.175776							TRUE	0.0209802	TRUE	3	34	1	74.3771				N	N	N	N
B7		36.4603	0.511168							TRUE	0.0209802	TRUE	3	35	1	78.7143				Y	N	N	N
B8		36.2134	0.0848602							TRUE	0.0209802	TRUE	3	35	1	78.7143				N	N	N	N
B9		36.0009	0.555791							TRUE	0.0209802	TRUE	3	34	1	78.7143				Y	N	N	N
B10		34.0606	0.607082							TRUE	0.0209802	TRUE	3	32	1	78.3371				Y	N	N	N
B11		33.0039	0.418385							TRUE	0.0209802	TRUE	3	32	1	78.1486				N	N	N	N
B12		37.4162	0.469102							TRUE	0.0209802	TRUE	3	35	1	77.96				N	N	N	N
C1		36.6329	1.94573		4.08635	1.39011			0	TRUE	0.0151454	TRUE	3	35	1	73.0571				Y	N	N	N
C2		36.7189	0.581872		4.62244	0.423781			0.536088	TRUE	0.0151454	TRUE	3	35	1	72.8686				Y	N	N	N
C3		36.2125			3.55738				-0.528965	TRUE	0.0151454	TRUE	3	35	1	72.8686				N	N	N	N
C4		36.7911	0.267808		2.67079	0.337608			-1.41556	TRUE	0.0151454	TRUE	3	35	1	72.68				N	N	N	N
C5		36.7434			0.0695419				-4.01681	TRUE	0.0151454	TRUE	3	35	1	72.1143				N	N	N	N
C6		37.2402			1.29624				-2.79011	TRUE	0.0151454	TRUE	3	35	1	73.0571				N	N	N	N
C7		37.1134			0.653091				-3.43326	TRUE	0.0151454	TRUE	3	35	1	72.1143				N	N	N	N
C8		35.8373			-0.376068				-4.46242	TRUE	0.0151454	TRUE	3	36	1	72.3029				N	N	Y	N
C9		37.5192	1.02603		1.51831	0.825116			-2.56804	TRUE	0.0151454	TRUE	3	35	1	62.3086				Y	N	N	N
C10		33.6606			-0.400028				-4.48638	TRUE	0.0151454	TRUE	3	39	1	62.4971				N	Y	Y	N
C11		36.2146			3.21068				-0.875669	TRUE	0.0151454	TRUE	3	35	1	72.4914				N	N	N	N
C12		36.831			-0.585199				-4.67155	TRUE	0.0151454	TRUE	3	35	1	72.68				N	N	N	N
D1		36.6329	1.94573		4.08635	1.39011			0	TRUE	0.0151454	TRUE	3	34	1	71.9257				Y	N	N	N
D2		36.7189	0.581872		4.62244	0.423781			0.536088	TRUE	0.0151454	TRUE	3	35	1	73.0571				Y	N	N	N
D3		36.2125			3.55738				-0.528965	TRUE	0.0151454	TRUE	3	38	1	62.3086				N	N	Y	N
D4		36.7911	0.267808		2.67079	0.337608			-1.41556	TRUE	0.0151454	TRUE	3	35	1	73.4343				N	N	N	N
D5		36.7434			0.0695419				-4.01681	TRUE	0.0151454	TRUE	3	39	1	62.3086				N	Y	Y	N
D6		37.2402			1.29624				-2.79011	TRUE	0.0151454	TRUE	3	39	1	62.4971				N	N	Y	N
D7		37.1134			0.653091				-3.43326	TRUE	0.0151454	TRUE	3	38	1	62.3086				N	N	Y	N
D8		35.8373			-0.376068				-4.46242	TRUE	0.0151454	TRUE	3	35	1	72.4914				N	N	N	N
D9		37.5192	1.02603		1.51831	0.825116			-2.56804	TRUE	0.0151454	TRUE	3	35	1	73.0571				Y	N	N	N
D10		33.6606			-0.400028				-4.48638	TRUE	0.0151454	TRUE	3	33	1	72.68				N	N	N	N
D11		36.2146			3.21068				-0.875669	TRUE	0.0151454	TRUE	3	39	1	62.3086				N	N	Y	N
D12		36.831			-0.585199				-4.67155	TRUE	0.0151454	TRUE	3	39	1	62.4971				N	Y	Y	N
E1		33.6814	0.193951		1.13491	0.241412			0	TRUE	0.0281896	TRUE	3	32	1	80.9771				N	N	N	N
E2		34.4811	0.328341		2.38464	0.25339			1.24973	TRUE	0.0281896	TRUE	3	32	1	80.9771				N	N	N	N
E3		33.9121	0.280432		1.25702	0.317936			0.12211	TRUE	0.0281896	TRUE	3	32	1	80.9771				N	N	N	N
E4		35.6188	0.0894646		1.49847	0.286567			0.363562	TRUE	0.0281896	TRUE	3	34	1	81.1657				N	N	N	N
E5		36.1011	0.303166		-0.572723	0.276974			-1.70764	TRUE	0.0281896	TRUE	3	34	1	80.9771				N	N	N	N
E6		39.4604			3.51644				2.38152	TRUE	0.0281896	TRUE	3	35	1	62.6857				N	N	N	N
E7		35.5967	0.346786		-0.863546	0.43678			-1.99846	TRUE	0.0281896	TRUE	3	34	1	81.1657				N	N	N	N
E8		37.0446	0.123646		0.831228	0.106041			-0.303684	TRUE	0.0281896	TRUE	3	35	1	80.9771				N	N	N	N
E9		35.4061	0.0616032		-0.594797	0.39541			-1.72971	TRUE	0.0281896	TRUE	3	33	1	80.9771				N	N	N	N
E10		34.5287	0.0906407		0.468115	0.43403			-0.666798	TRUE	0.0281896	TRUE	3	33	1	80.7886				N	N	N	N
E11		34.0896	0.204965		1.08573	0.329436			-0.0491829	TRUE	0.0281896	TRUE	3	32	1	80.6				N	N	N	N
E12										TRUE	0.0281896	TRUE	3	39	1	62.3086				N	N	Y	N
F1		33.6814	0.193951		1.13491	0.241412			0	TRUE	0.0281896	TRUE	3	32	1	80.7886				N	N	N	N
F2		34.4811	0.328341		2.38464	0.25339			1.24973	TRUE	0.0281896	TRUE	3	33	1	80.9771				N	N	N	N
F3		33.9121	0.280432		1.25702	0.317936			0.12211	TRUE	0.0281896	TRUE	3	32	1	81.1657				N	N	N	N
F4		35.6188	0.0894646		1.49847	0.286567			0.363562	TRUE	0.0281896	TRUE	3	34	1	81.1657				N	N	N	N
F5		36.1011	0.303166		-0.572723	0.276974			-1.70764	TRUE	0.0281896	TRUE	3	34	1	81.1657				N	N	N	N
F6		39.4604			3.51644				2.38152	TRUE	0.0281896	TRUE	3	37	1	62.6857				N	N	Y	N
F7		35.5967	0.346786		-0.863546	0.43678			-1.99846	TRUE	0.0281896	TRUE	3	33	1	80.9771				N	N	N	N
F8		37.0446	0.123646		0.831228	0.106041			-0.303684	TRUE	0.0281896	TRUE	3	35	1	80.9771				N	N	N	N
F9		35.4061	0.0616032		-0.594797	0.39541			-1.72971	TRUE	0.0281896	TRUE	3	33	1	80.7886				N	N	N	N
F10		34.5287	0.0906407		0.468115	0.43403			-0.666798	TRUE	0.0281896	TRUE	3	32	1	80.6				N	N	N	N
F11		34.0896	0.204965		1.08573	0.329436			-0.0491829	TRUE	0.0281896	TRUE	3	32	1	80.6				N	N	N	N
F12										TRUE	0.0281896	TRUE	3	38	1	62.3086				N	N	Y	N
G1										TRUE	0.0151163	TRUE	3	39	1	62.4971				N	Y	Y	N
G2		37.0284			4.93191					TRUE	0.0151163	TRUE	3	39	1	62.3086				N	Y	Y	N
G3										TRUE	0.0151163	TRUE	3	39	1	62.4971				N	Y	Y	N
G4										TRUE	0.0151163	TRUE	3	39	1	62.4971				N	N	Y	N
G5										TRUE	0.0151163	TRUE	3	39	1	62.4971				N	N	Y	N
G6										TRUE	0.0151163	TRUE	3	39	1	62.6857				N	N	Y	N
G7										TRUE	0.0151163	TRUE	3	39	1	62.4971				N	N	Y	N
G8										TRUE	0.0151163	TRUE	3	39	1	62.4971				N	N	Y	N
G9										TRUE	0.0151163	TRUE	3	37	1	70.4171				N	N	Y	N
G10										TRUE	0.0151163	TRUE	3	39	1	62.4971				N	Y	Y	N
G11										TRUE	0.0151163	TRUE	3	39	1	62.4971				N	N	Y	N
G12										TRUE	0.0151163	TRUE	3	39	1	62.4971				N	Y	Y	N
H1										TRUE	0.0151163	TRUE	3	39	1	63.0629				N	Y	Y	N
H2		37.0284			4.93191					TRUE	0.0151163	TRUE	3	35	1	69.8514				N	N	N	N
H3										TRUE	0.0151163	TRUE	3	39	1	62.4971				N	Y	Y	N
H4										TRUE	0.0151163	TRUE	3	39	1	62.3086				N	Y	Y	N
H5										TRUE	0.0151163	TRUE	3	39	1	62.4971				N	Y	Y	N
H6										TRUE	0.0151163	TRUE	3	39	1	62.4971				N	Y	Y	N
H7										TRUE	0.0151163	TRUE	3	39	1	62.3086				N	Y	Y	N
H8										TRUE	0.0151163	TRUE	3	39	1	62.4971				N	Y	Y	N
H9										TRUE	0.0151163	TRUE	3	39	1	62.3086				N	Y	Y	N
H10										TRUE	0.0151163	TRUE	3	39	1	62.4971				N	Y	Y	N
H11										TRUE	0.0151163	TRUE	3	39	1	62.4971				N	Y	Y	N
H12										TRUE	0.0151163	TRUE	3	39	1	62.4971				N	Y	Y	N
Analysis Type	Singleplex
Endogenous Control	act
RQ Min/Max Confidence Level	95.0
Reference Sample	ck-wt

## Sheet: Sheet2
Factorial Analysis: One-Factor ANOVA
SUMMARY
Group	Number of Observations	Sum	Average	Variance
3.3	1	3	3	#DIV/0!
0.4	1	0.5	0.5	#DIV/0!
ANOVA
SD	SS	df	MS	F	P-value	F crit
Between groups	3.125	1	3.125	65535	#NUM!	#NUM!
Within groups	0	0	65535
Total	3.125	1

## Sheet: Sheet1
					Cт
							ACT		ACT AVERAGE		ABI4			AV	STER
					CK WT		32.3478	32.7452	32.5465		33.5443	33.8186		1	0
					CK 66		32.995	33.198	33.0965		34.2489	34.7133		0.842881	0.0784026
					CK 905		32.4066	32.9036	32.6551		33.7138	34.1104		0.919668	0.0550958
					CK SHUANG		33.8408	34.3998	34.1203		35.5555	35.6821		0.778263	0.056316
					ABA WT		35.6079	36.3939	36.0009		35.3625	35.4497		3.32359	0.304468
					ABA 66		33.6313	34.4899	34.0606		34.5928	34.4646		1.96027	0.522124
					ABA 905		32.708	33.2997	33.0039		34.2346	33.9447		2.13201	0.167023
					ABA SHUANG		37.0845	37.7479	37.4162		34.2536	34.4538		0.859886	0.0673638
													WT	lrr1-1	kin7	lrr1kin7
												CK	1	0.842881	0.919668	0.778263
												5 μM ABA	3.32359	1.96027	2.13201	0.859886
												STER	0	0.0784026	0.0550958	0.056316
													0.304468	0.522124	0.167023	0.0673638
