# Supplementary material for: LRR1 involved in the abscisic acid signaling pathway to regulate the early growth and development of Arabidopsis thaliana
Source: PeerJ. 2024 Nov 26;12:e18460. doi: 10.7717/peerj.18460 (PMC11606324; doi:10.7717/peerj.18460)
Supplement: Supplemental Information 8 [file peerj-12-18460-s008.xls]

## Sheet: Results
Block Type	96alum
Chemistry	SYBR_GREEN
Experiment File Name--Data 8 LRB1 Regulates ABA-induced Gene Expression data, 0.8 μM (±) ABA treatment ABI5
Experiment Run End Time	Not Started
Instrument Type	sds7500
Passive Reference	ROX
Well	Sample Name	Target Name	Task	Reporter	Quencher	RQ	RQ Min	RQ Max	Cт	Cт Mean	Cт SD	ΔCт	ΔCт Mean	ΔCт SE	HK Control ΔCт Mean	HK Control ΔCт SE	ΔΔCт	Automatic Ct Threshold	Ct Threshold	Automatic Baseline	Baseline Start	Baseline End	Efficiency	Tm1	Tm2	Tm3	Comments	HIGHSD	NOAMP	EXPFAIL	MTP
A2	ACT CK	WT	UNKNOWN	SYBR	None				23.1045	23.3095	0.290015							TRUE	0.0247861	TRUE	3	21	1	79.9536				N	N	N	N
A3	ACT CK	lrb1	UNKNOWN	SYBR	None	1	0.348501	2.86943	26.5388	22.2509	0.407116		-1.05863	0.353449			0	TRUE	0.0189463	TRUE	3	21	1	80.1344				N	N	N	N
A4	ACT CK	lrb2	UNKNOWN	SYBR	None	1	0.370302	2.7005	25.4092	22.6717	0.371223		-0.6378	0.333103			0	TRUE	0.0156954	TRUE	3	21	1	79.9536				N	N	N	N
A5	ACT CK	lrb1lrb2	UNKNOWN	SYBR	None	1	0.000202512	4937.99	26.6993	28.3247	6.66835		5.01515	3.85543			0	TRUE	0.0143081	TRUE	3	23	1	80.1344				Y	N	N	N
B2	ACT CK	WT	UNKNOWN	SYBR	None				23.5146	23.3095	0.290015							TRUE	0.0247861	TRUE	3	21	1	80.3153				N	N	N	N
B3	ACT CK	lrb1	UNKNOWN	SYBR	None	1	0.348501	2.86943	25.963	22.2509	0.407116		-1.05863	0.353449			0	TRUE	0.0189463	TRUE	3	20	1	79.5918				N	N	N	N
B4	ACT CK	lrb2	UNKNOWN	SYBR	None	1	0.370302	2.7005	23.9342	22.6717	0.371223		-0.6378	0.333103			0	TRUE	0.0156954	TRUE	3	21	1	80.1344				N	N	N	N
B5	ACT CK	lrb1lrb2	UNKNOWN	SYBR	None	1	0.000202512	4937.99	26.2544	28.3247	6.66835		5.01515	3.85543			0	TRUE	0.0143081	TRUE	3	23	1	80.1344				Y	N	N	N
C2	abi5 ck	WT	UNKNOWN	SYBR	None				32.9216	32.9216								TRUE	0.0247861	TRUE	3	31	1	82.124				N	N	N	N
C3	abi5 ck	lrb1	UNKNOWN	SYBR	None	0.0185919			36.0437	37.6121	2.21816		4.69054				5.74918	TRUE	0.0189463	TRUE	3	34	1	81.5814				Y	N	N	N
C4	abi5 ck	lrb2	UNKNOWN	SYBR	None	0.291317			34.0335	34.0631	1.45607		1.14154				1.77934	TRUE	0.0156954	TRUE	3	31	1	81.7623				Y	N	N	N
C5	abi5 ck	lrb1lrb2	UNKNOWN	SYBR	None	3.98877			35.9408	35.9408			3.0192				-1.99595	TRUE	0.0143081	TRUE	3	34	1	81.7623				N	N	N	N
D2	abi5 ck	WT	UNKNOWN	SYBR	None				33.0326	32.9216								TRUE	0.0247861	TRUE	3	39	1	61.8661				N	Y	Y	N
D3	abi5 ck	lrb1	UNKNOWN	SYBR	None	0.0185919			36.1806	37.6121	2.21816		4.69054				5.74918	TRUE	0.0189463	TRUE	3	35	1	81.2197				Y	N	N	N
D4	abi5 ck	lrb2	UNKNOWN	SYBR	None	0.291317			35.0927	34.0631	1.45607		1.14154				1.77934	TRUE	0.0156954	TRUE	3	34	1	81.7623				Y	N	N	N
D5	abi5 ck	lrb1lrb2	UNKNOWN	SYBR	None	3.98877			35.8826	35.9408			3.0192				-1.99595	TRUE	0.0143081	TRUE	3	39	1	80.4962	65.3027			N	Y	Y	Y
D7	ACT CK	ddH2O	UNKNOWN	SYBR	None	1	0.000202512	4937.99	36.0204	28.3247	6.66835		5.01515	3.85543			0	TRUE	0.0143081	TRUE	3	35	1	80.1344				Y	N	N	N
E2	act aba	WT	UNKNOWN	SYBR	None				21.5842	21.7533	0.239101							TRUE	0.0247861	TRUE	3	20	1	80.1344				N	N	N	N
E3	act aba	lrb1	UNKNOWN	SYBR	None	0.98204	0.439009	2.19677	20.9313	20.7208	0.297631		-1.03249	0.269957			0.0261459	TRUE	0.0189463	TRUE	3	19	1	80.1344				N	N	N	N
E4	act aba	lrb2	UNKNOWN	SYBR	None	0.461617	0.163864	1.30041	22.5341	22.2307	0.428986		0.477431	0.347274			1.11523	TRUE	0.0156954	TRUE	3	21	1	80.3153				N	N	N	N
E5	act aba	lrb1lrb2	UNKNOWN	SYBR	None	21.1856	9.48749	47.3076	22.5731	22.3634	0.296557		0.610135	0.269366			-4.40501	TRUE	0.0143081	TRUE	3	21	1	80.8579				N	N	N	N
F2	act aba	WT	UNKNOWN	SYBR	None				21.9224	21.7533	0.239101							TRUE	0.0247861	TRUE	3	20	1	80.3153				N	N	N	N
F3	act aba	lrb1	UNKNOWN	SYBR	None	0.98204	0.439009	2.19677	20.5104	20.7208	0.297631		-1.03249	0.269957			0.0261459	TRUE	0.0189463	TRUE	3	19	1	80.677				N	N	N	N
F4	act aba	lrb2	UNKNOWN	SYBR	None	0.461617	0.163864	1.30041	21.9274	22.2307	0.428986		0.477431	0.347274			1.11523	TRUE	0.0156954	TRUE	3	20	1	80.677				N	N	N	N
F5	act aba	lrb1lrb2	UNKNOWN	SYBR	None	21.1856	9.48749	47.3076	22.1537	22.3634	0.296557		0.610135	0.269366			-4.40501	TRUE	0.0143081	TRUE	3	21	1	80.677				N	N	N	N
F7	act aba	ddH2O	UNKNOWN	SYBR	None	21.1856	9.48749	47.3076	Undetermined	22.3634	0.296557		0.610135	0.269366			-4.40501	TRUE	0.0143081	TRUE	3	39	1	67.1115				N	Y	Y	N
G2	abi5 aba	WT	UNKNOWN	SYBR	None				28.9854	29.1457								TRUE	0.0247861	TRUE	3	39	1	68.7393				N	Y	Y	N
G3	abi5 aba	lrb1	UNKNOWN	SYBR	None	0.465705			29.4396	29.1896	0.35354		0.0438786				1.10251	TRUE	0.0189463	TRUE	3	28	1	81.9432				N	N	N	N
G4	abi5 aba	lrb2	UNKNOWN	SYBR	None	0.499128			29.2098	29.5104	0.425092		0.364718				1.00252	TRUE	0.0156954	TRUE	3	28	1	82.124				N	N	N	N
G5	abi5 aba	lrb1lrb2	UNKNOWN	SYBR	None	4.13994			30.2848	32.1112	2.58292		2.96554				-2.04961	TRUE	0.0143081	TRUE	3	29	1	81.9432				Y	N	N	N
G7	act aba	ddH2O	UNKNOWN	SYBR	None	21.1856	9.48749	47.3076	Undetermined	22.3634	0.296557		0.610135	0.269366			-4.40501	TRUE	0.0143081	TRUE	3	39	1	76.8787	82.4858	70.1863		N	Y	Y	Y
H2	abi5 aba	WT	UNKNOWN	SYBR	None				29.1457	29.1457								TRUE	0.0247861	TRUE	3	26	1	81.7623				N	N	N	N
H3	abi5 aba	lrb1	UNKNOWN	SYBR	None	0.465705			28.9396	29.1896	0.35354		0.0438786				1.10251	TRUE	0.0189463	TRUE	3	27	1	81.5814				N	N	N	N
H4	abi5 aba	lrb2	UNKNOWN	SYBR	None	0.499128			29.811	29.5104	0.425092		0.364718				1.00252	TRUE	0.0156954	TRUE	3	28	1	81.7623				N	N	N	N
H5	abi5 aba	lrb1lrb2	UNKNOWN	SYBR	None	4.13994			33.9376	32.1112	2.58292		2.96554				-2.04961	TRUE	0.0143081	TRUE	3	32	1	81.5814				Y	N	N	N
Analysis Type	Singleplex
Endogenous Control	WT
RQ Min/Max Confidence Level	95.0
Reference Sample	ACT CK

## Sheet: Sheet1
												Cт
				Sample Name	Target Name		Cт
				ACT CK	WT
				ACT CK	66
				ACT CK	905
				ACT CK	shuang								ACT		ACT AVERAGE		ABI5			AV	STER
				ACT CK	WT						CK WT		23.1045	23.5146	23.3095		32.9216	33.0326		1	0
				ACT CK	66						CK lrb1-1		26.5388	25.963	26.2509		36.0437	36.1806		0.874412	0.0111188
				ACT CK	905						CK lrb2		25.4092	23.9342	24.6717		34.0335	35.0927		0.902941	0.405147
				ACT CK	shuang						CK lrb1lrb2		26.6993	26.2544	26.4769		35.9408	35.8826		1.17708	0.0975237
				abi5 ck	WT						ABA WT		21.5842	21.9224	21.7533		28.9854	29.1457		5.11777	0.123594
				abi5 ck	66						ABA lrb1-1		20.9313	20.5104	20.7208		29.4396	28.9396		1.96027	0.522124
				abi5 ck	905						ABA lrb2		22.5341	21.9274	22.2307		29.2098	29.811		2.13201	0.167023
				abi5 ck	shuang						ABA lrb1lrb2		22.5731	22.1537	22.3634		30.2848	33.9376		0.859886	0.0673638
				abi5 ck	WT
				abi5 ck	66
				abi5 ck	905
				abi5 ck	shuang
				ACT CK	shuang		36.0204
				act aba	WT
				act aba	66
				act aba	905															WT	lrr1-1	kin7	lrr1kin7
				act aba	shuang														CK	1	0.874412	0.902941	1.17708
				act aba	WT														0.8 μM ABA	5.11777	1.96027	2.13201	0.859886
				act aba	66
				act aba	905														STER	0	0.0111188	0.405147	0.0975237
				act aba	shuang															0.123594	0.522124	0.167023	0.0673638
				act aba	shuang		22.3634
				abi5 aba	WT
				abi5 aba	66
				abi5 aba	905
				abi5 aba	shuang
				act aba	shuang		22.3634
				abi5 aba	WT
				abi5 aba	66
				abi5 aba	905
				abi5 aba	shuang
