# Supplementary material for: LRR1 involved in the abscisic acid signaling pathway to regulate the early growth and development of Arabidopsis thaliana
Source: PeerJ. 2024 Nov 26;12:e18460. doi: 10.7717/peerj.18460 (PMC11606324; doi:10.7717/peerj.18460)
Supplement: Supplemental Information 9 [file peerj-12-18460-s009.xls]

## Sheet: Results
Block Type	96alum
Chemistry	SYBR_GREEN
Experiment File Name	Data 9 LRR1 Regulates ABA-induced Gene Expression data, 5 μM (±) ABA treatment ABI5
Experiment Run End Time	2015-08-27 00:02:14 上午 CST
Instrument Type	sds7500
Passive Reference	ROX
Analysis Type	Singleplex
Endogenous Control	act 25
RQ Min/Max Confidence Level	95.0
Reference Sample	ck wt					Cт
						ACT		ACT AVERAGE		ABI5			AV	STER
					CK WT	24.089	23.868	23.9785		29.509	29.353		1	0
					CK lrb1-1	23.933	23.408	23.6705		29.033	28.544		1.26935	0.412518
					CK lrb2	22.617	23.56	23.0885		28.947	28.374		0.930136	0.188792
					CK lrb1lrb2	24.152	23.632	23.892		28.735	28.707		1.54212	0.0966841
					ABA WT	26.444	26.703	26.5735		28.676	28.444		11.054	0.411665
					ABA lrb1-1	24.88	24.839	24.8595		28.264	27.936		1.96027	0.522124
					ABA lrb2	25.276	24.046	24.661		28.383	29.221		2.13201	0.167023
					ABA lrb1lrb2	24.706	24.258	24.482		28.367	28.641		0.859886	0.0673638
											WT	lrr1-1	kin7	lrr1kin7
										CK	1	1.26935	0.930136	1.54212
										5 μM ABA	11.054	1.96027	2.13201	0.859886
										STER	0	0.412518	0.188792	0.0966841
											0.411665	0.522124	0.167023	0.0673638
