# Supplementary material for: LRR1 involved in the abscisic acid signaling pathway to regulate the early growth and development of Arabidopsis thaliana
Source: PeerJ. 2024 Nov 26;12:e18460. doi: 10.7717/peerj.18460 (PMC11606324; doi:10.7717/peerj.18460)
Supplement: Supplemental Information 12 [file peerj-12-18460-s012.xlsx]

## Sheet: Sheet1
		Types of primers	Forward primers		Reverse primer
		Salk_001905	5′GCTGGGGGTAAAGAATGAGAC 3′		5′ATTCTTCGTCTCCTTGGTTCC 3′
		Salk_053366	5′AGTTTGGGCCGAAATAAAAAC 3′		5′GTCACGAAGTGCGATTAGAGC 3′
		SAIL_412	5′CCATGAAATAAAAGGGGCTTC 3′		5′GACTCGGAGATTGGTTTTTCC 3′
		LBa1	5′ TGGTTCACGTAGTGGGCCATCG 3′
		LB1	5′ TCAAACAGGATTTTCGCCTGCT 3′
		LRR1::pCAMBIA1300	5′AGCGGTACCTAATACGCAAACGCAAAGTAA 3′		5′ CGGGTCGACTAATTTGTTTCACACTCAATC 3′
		LRR1::pHBT	5′ATAGTCGACATGAGGAGCGTTGCCGCCGC 3′		5′ GGGGGATCCGGAAATGTCTTGGACCTTAG 3′
		LRR1::PCAMBIA-GUS	5′GTCGGATCCCTATTATTGTATTCGCACCACCC 3′		5' CATCCATGGCTTACCCAAAGCTTAATCCTTTA3'
		LRR1::pEX-2TK	5'ACAGTCGACGTATGAAGAACAAGACCAATTT 3'		5'ACAGAATTCGATCAATCGGACAAAGGACCTG3'
