# Supplementary material for: LRR1 involved in the abscisic acid signaling pathway to regulate the early growth and development of Arabidopsis thaliana
Source: PeerJ. 2024 Nov 26;12:e18460. doi: 10.7717/peerj.18460 (PMC11606324; doi:10.7717/peerj.18460)
Supplement: Supplemental Information 13 [file peerj-12-18460-s013.xlsx]

## Sheet: Sheet1
	Types of primers	Forward primers		Reverse primer
	ACTIN-2	5' TCTTCCGCTCTTTCTTTCCA 3'		5' GAGAGAACAGCTTGGATGGC 3'
	LRR1	5' GTGATCGGCTGTTTCGTCTTGCTT 3'		5' ATTGCTCTTGCGGCTCCTAATGCT 3'
	KIN7	5' GCACGGGAACAAAGGAAA 3'		5' TCAAGGATTAGGACGCCA 3'
	ACTIN-2	5' GGTAACATTGTGCTCAGTGGTGG 3'		5' AACGACCTTAATCTTCATGCTGC 3'
	LRR1	5' CAGCCCTACTTCTACACCTAAC 3'		5' GCTGATGCGTTGGAGATTTC 3'
	KIN7	5' TGCATGTTTTGGGATCAATGAG 3'		5' TCTCCCGTTTCCTTTGTTCC 3'
	ABI1	5' CGTCTCACATCTTCGTCGCT 3'		5' TCAATCCTCGCAGCTTCATC 3'
	ABI2	5' GGCTCGGAAACGGATTTTAC 3'		5' GCAAAGCCATCTTCGACAAA 3'
	ABI3	5' GATTGAATCAGCGGCAAGAA 3'		5' GTTGTTGTGGTGGTGGAGGA 3'
	ABI4	5' ATCCTCAATCCGATTCCACC 3'		5' ATTTGCCCCAGCTTCTTTGT 3'
	ABI5	5' GGCGCAAGCGAGACATAAT 3'		5' CCCTCGCCTCCATTGTTATT 3'
	SnRK2.2	5' TAATGCCGGACGGTTTAGTG 3'		5' TATTTTCAAACGAGGTGCCG 3'
	SnRK2.3	5' CATTTTGACGCCGACTCATC 3'		5' TTCAGGTCACGATGGCAAAT 3'
