# Supplementary material for: LRR1 involved in the abscisic acid signaling pathway to regulate the early growth and development of Arabidopsis thaliana
Source: PeerJ. 2024 Nov 26;12:e18460. doi: 10.7717/peerj.18460 (PMC11606324; doi:10.7717/peerj.18460)
Supplement: Supplemental Information 14 [file peerj-12-18460-s014.xlsx]

## Sheet: Sheet1
		Types of primers	Forward primers			Reverse primer
		BD-LRR1	5′CATGCCATGGCAATGAAGAACAAGACCAATTT3′			5′ACGCGTCGACTCAATCGGACAAAGGACCTG3′
		BD-KIN7	5′CATGCCATGGCAATGAAGTATAAGCGTAAGC3′			5′ACGCGTCGACTCAGTCGGATACAGGATTTG3′
		AD-ABI1	5′GGAATTCCATATGATGGAGGAAGTATCTCCG3′			5′CGGGATCCTCAGTTCAAGGGTTTGCTCTT3′
		AD-ABI2	5′GGAATTCCATATGATGGACGAAGTTTCTCCTG3′			5′TCCCCCGGGTCAATTCAAGGATTTGCTCTT3′
		AD-SnRK2.2	5′GGAATTCCATATGATGGATCCGGCGACTAAT3′			5′CGGAATTCTCAGAGAGCATAAACTATCTC3′
		AD-SnRK2.3	5′CGGAATTCATGGATCGAGCTCCGGTG3′			5′CGGGATCCTTAGAGAGCGTAAACTAT3′
		AD-SnRK2.6	5′CGGAATTCATGGATCGACCAGCAGTG3′			5′CGGGATCCTCACATTGCGTACACAAT3′
		YCE-LRR1	5′TCCCCCGGGCGATGAAGAACAAGACCAATTTAG3′			5′GCGTCGACATCGGACAAAGGACCTGGTGAAG3′
		YCE-KIN7	5′TCCCCCGGGCTATGAAGTATAAGCGTAAG3′			5′GCGTCGACGTCGGATACAGGATTTGG3′
		YNE-ABI1	5′CGGGATCCATGGAGGAAGTATCTCCG3′			5′GCGTCGACTCAGTTCAAGGGTTTGCTC3′
		YNE-ABI2	5′GCTCTAGAATGGACGAAGTTTCTCCTG3′			5′GCGTCGACTCAATTCAAGGATTTGCTC3′
		YNE-PYL6	5′CGGGATCCATGCCAACGTCGATACAG3′			5′GCGTCGACTTACGAGAATTTAGAAGTG3′
		LRR1-His	5′CAAGTCGACCATGAAGAACAAGACCAATTTA3′			5′TTCGAATTCTCAATCGGACAAAGGACCTGGT3′
		LRR1-GST	5′ACAGTCGACGTATGAAGAACAAGACCAATTT3′			5′ACAGAATTCGATCAATCGGACAAAGGACCTG3′
		LRR1-MYC	5′ACGCGTCGACCTTAGCTTACGCTTATACTTCAT3′			5′GGACTAGTTCCCCAAATCCTGTATCCGACTG3′
		PYL6-His	5′CGGGATCCATGCCAACGTCGATACAG3′			5′GCGTCGACTTACGAGAATTTAGAAGTG3′
		ABI1-His	5′GCGTCGACATGGAGGAAGTATCTCCG3′			5′GGGGTACCGTTCAAGGGTTTGCTCTTG3′
		The vectors of PYL family and SnRK2s family members used in yeast two-hybrid experiments were provided by our laboratory
