# Supplementary material for: LRR1 involved in the abscisic acid signaling pathway to regulate the early growth and development of Arabidopsis thaliana
Source: PeerJ journal article supplement (doi:10.7717/peerj.18460), 2024-11-26

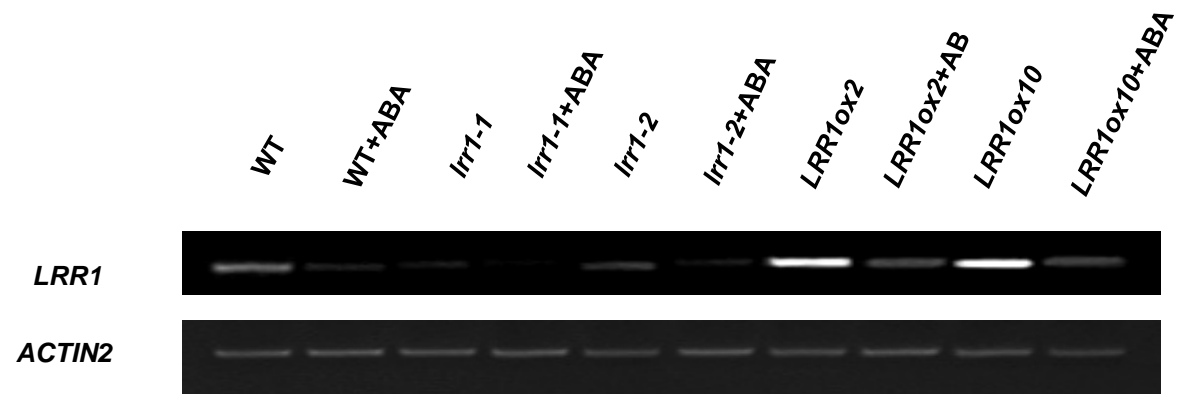

Supplement: Supplementary_Figure_2.pdf [file Supplementary_Figure_2.pdf]
